# Supplementary material for: Parent-of-Origin inference and its role in the genetic architecture of complex traits: evidence from ~265,000 individuals
Source: Research Square preprint supplement (doi:10.21203/rs.3.rs-5871891/v1), 2025-01-23
Supplement: Supplementary file 1 [file 76f76ed7650bb027ffedb6b9.pdf]

# Parent-of-Origin inference and its role in the genetic architecture of complex traits: evidence from ~265,000 individuals

Robin J. Hofmeister<sup>1,2,3,4,✉</sup>, Théo Cavinato<sup>1,3</sup>, Roya Karimi<sup>5</sup>, Adriaan van der Graaf<sup>1,3</sup>, Fanny-Dhelia Pajuste<sup>4</sup>, Jaanika Kronberg<sup>4</sup>, Nele Taba<sup>4</sup>, Estonian Biobank research team<sup>\*</sup>, Reedik Mägi<sup>4</sup>, Marc Vaudel<sup>5,6</sup>, Simone Rubinacci<sup>7</sup>, Stefan Johansson<sup>5,8</sup>, Lili Milani<sup>4,9</sup>, Olivier Delaneau<sup>10</sup>, and Zoltán Kutalik<sup>1,2,3,✉</sup>

<sup>1</sup>Department of Computational Biology, University of Lausanne, Lausanne, Switzerland, <sup>2</sup>University Center for Primary Care and Public Health, Lausanne, Switzerland, <sup>3</sup>Swiss Institute of Bioinformatics (SIB), University of Lausanne, Lausanne, Switzerland, <sup>4</sup>Estonian Genome Centre, Institute of Genomics, University of Tartu, Estonia, <sup>5</sup>Mohn Center for Diabetes Precision Medicine, Department of Clinical Science, University of Bergen, Bergen, Norway, <sup>6</sup>Department of Genetics and Bioinformatics, Health Data and Digitalization, Norwegian Institute of Public Health, Oslo, Norway, <sup>7</sup>Institute for Molecular Medicine Finland, Helsinki, Finland, <sup>8</sup>Department of Pediatrics, Haukeland University Hospital, Bergen, Norway, <sup>9</sup>Estonian Biobank, Institute of Genomics, University of Tartu, Estonia, <sup>10</sup>Regeneron Genetics Center, Tarrytown, NY, USA, <sup>\*</sup>Lists of authors and their affiliations appear at the end of the paper, ✉ Corresponding authors: [Robin J. Hofmeister](#) and [Zoltán Kutalik](#)

**This document contains supplementary figures and supplementary tables only.**

Supplementary tables can also be visualized online and downloaded via [this link](#) in excel format.

## Table of Content: Supplementary Figures

- Supplementary Fig. 1: Relatedness inference and clustering of close relatives in the UK Biobank.
- Supplementary Fig. 2: Validation cohort structure and distribution of surrogate parents.
- Supplementary Fig. 3: Inter-chromosomal phasing from close relative groups.
- Supplementary Fig. 4: Chromosome X IBD analysis for parental side assignment in males.
- Supplementary Fig. 5: Parental side assignment using mtDNA MVS in second-degree relatives.
- Supplementary Fig. 6: Parental side assignment using mtDNA MVS in third-degree relatives.
- Supplementary Fig. 7: Parental side assignment using mtDNA MVS in fourth-degree relatives.
- Supplementary Fig. 8: Summary of mtDNA MVS predictors and parental assignment probabilities.
- Supplementary Fig. 9: Chromosome Y MVS and parental side analysis.
- Supplementary Fig. 10: Evaluation of sibling scores in inter- and intra-chromosomal phasing.
- Supplementary Fig. 11: Derivation of PofO probabilities from sibling scores.
- Supplementary Fig. 12: Parent-of-origin probabilities from intra-chromosomal phased data.
- Supplementary Fig. 13: Accuracy and error rates of parent-of-origin inference.
- Supplementary Fig. 14: Illustration of phasing and PofO errors.
- Supplementary Fig. 15: Classification of POEs in GWAS.
- Supplementary Fig. 16: Conditional analysis on standing height at 11p15.5.
- Supplementary Fig. 17: Co-localization analysis at 11p15.5.
- Supplementary Fig. 18: Conditional analysis on hip circumference at 7q32.2.
- Supplementary Fig. 19: POEs on BMI across different time points in the MoBa cohort.
- Supplementary Fig. 20: Sex-specific POE on glucose levels.
- Supplementary Fig. 21: Significant POE pQTLs for plasma protein levels.
- Supplementary Fig. 22: Overview of relatedness and inter-chromosomal phasing in the EstBB.

- Supplementary Fig. 23: Chromosome X IBD analysis in EstBB males.
- Supplementary Fig. 24: Sibling scores from phasing in the EstBB.
- Supplementary Fig. 26: Parent-of-origin probability distribution in the EstBB.

## Table of Content: Supplementary Tables

- Supplementary Table 1: UK Biobank traits selected for this study.
- Supplementary Table 2: Replication of previously published Parent-of-Origin effects.
- Supplementary Table 3: Imprinted regions lifted over to hg19.
- Supplementary Table 4: Replication of standing height associations with sitting height.
- Supplementary Table 5: Parent-of-origin effects within additively associated regions, per phenotype.
- Supplementary Table 6: Parent-of-origin effects genome-wide.
- Supplementary Table 7: Replication of associations with early childhood traits in the UK Biobank.
- Supplementary Table 8: Number of individuals per BMI time point in the MoBa cohort.
- Supplementary Table 9: Replication of associations with infancy and childhood BMI in the MoBa cohort.
- Supplementary Table 10: Sex-specific Parent-of-Origin effects.
- Supplementary Table 11: Replication of Parent-of-Origin effects in the Estonian Biobank cohort.

## Supplementary Figures

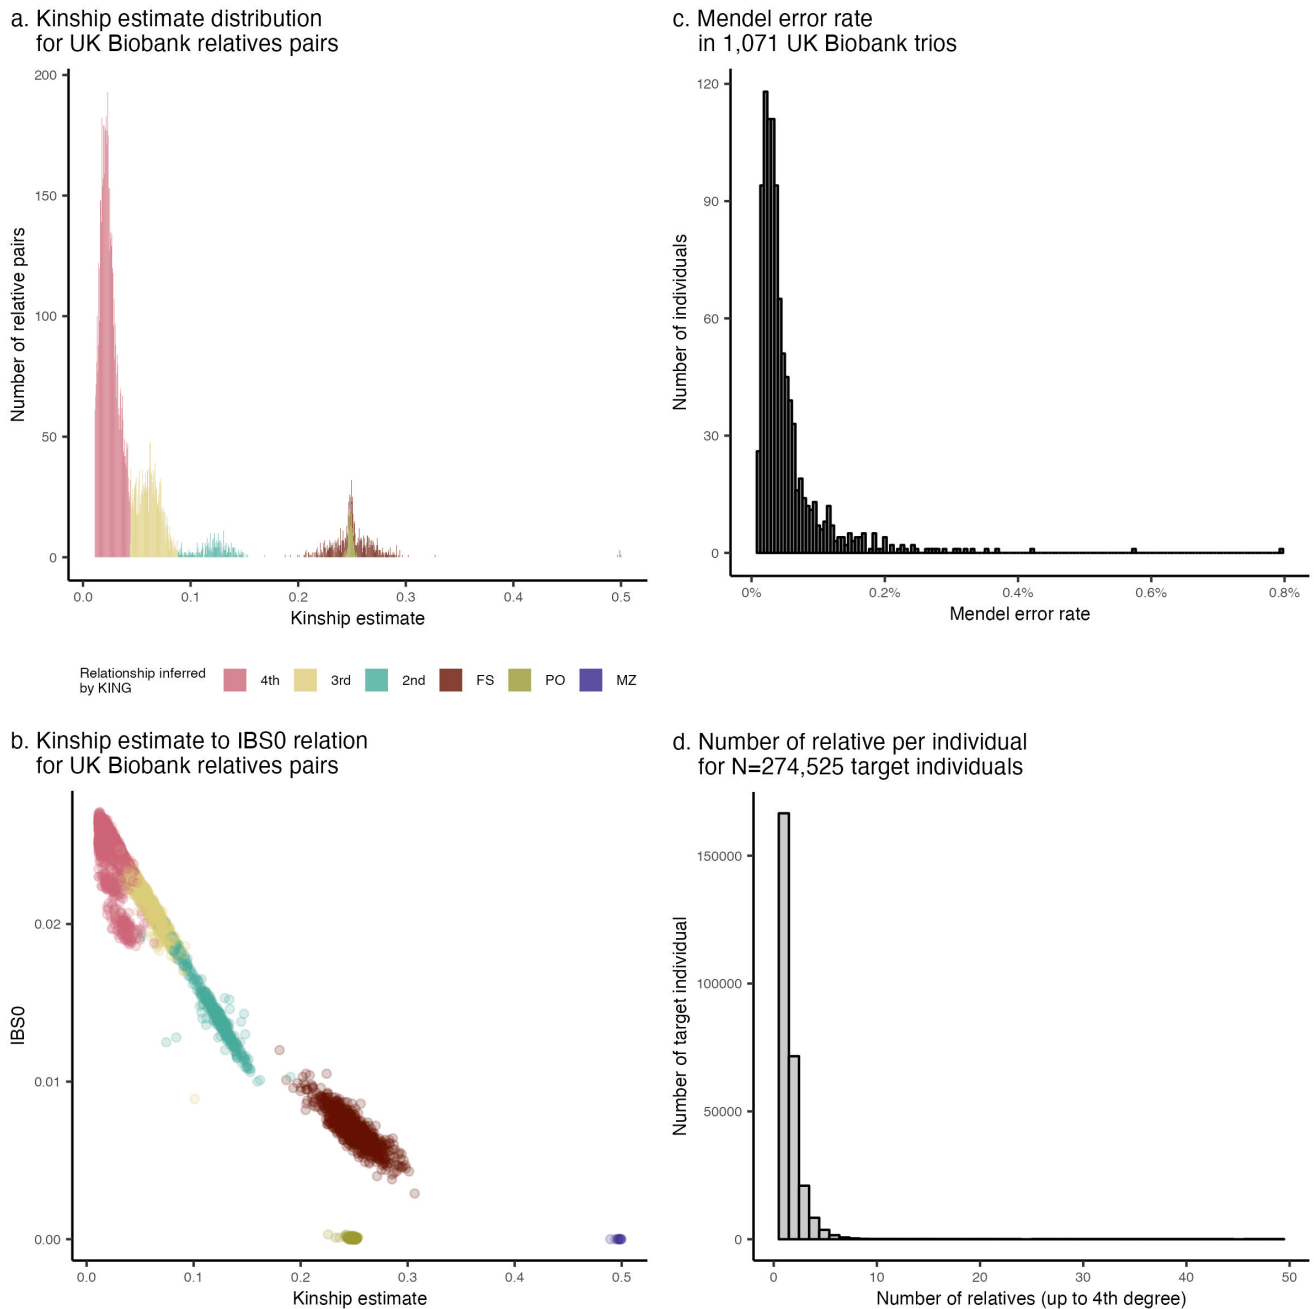

**Supplementary Fig. 1 | Relatedness inference and close relative clustering in the UK Biobank.** **a)** Kinship estimates distribution and **b)** Kinship estimates versus IBS0 estimates across all UK Biobank monozygotic twins (MZ), first siblings (FS), parent-offspring (PO), second-, third-, and fourth-degree relative pairs. **c)** Mendel error rate distribution across 1,071 UK Biobank parent-offspring trios. None of the trios exhibited a high error rate that would necessitate exclusion. **d)** Distribution of the number of close relatives (up to the fourth degree) per individual across 274,252 UK Biobank individuals with available surrogate parent cluster(s). We found on average 1.65 relatives per individual.



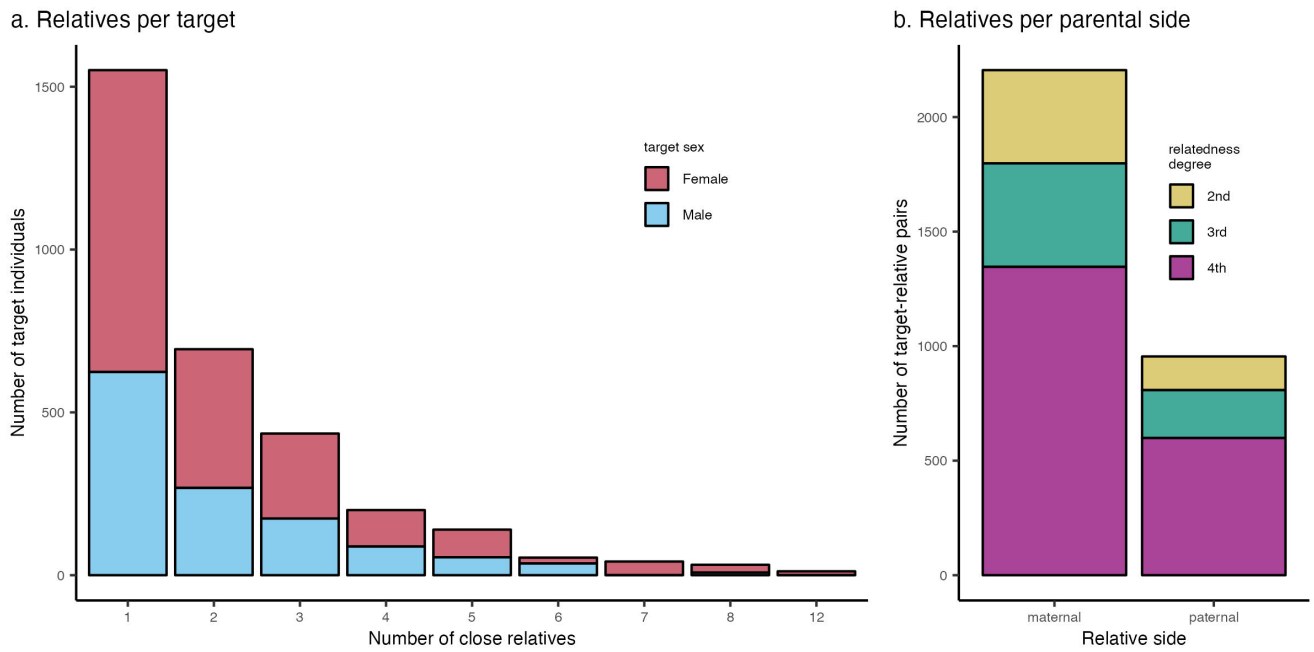

**Supplementary Fig. 2 | Validation cohort structure.** **a)** Distribution of the number of close relatives (up to the fourth degree) per individual across 2,141 UK Biobank individuals with both available surrogate parent cluster(s) and available parental genomes. Most target individuals are females (60.3%) and have a single surrogate parent (49%). **b)** Distribution of surrogate mother and surrogate father stratified by relatedness degree for 3,160 target-relative pairs. Approximately 70% of surrogate parents in the validation cohort are on the maternal side (i.e., surrogate mothers), and the majority are fourth-degree relatives pairs (61.5%).

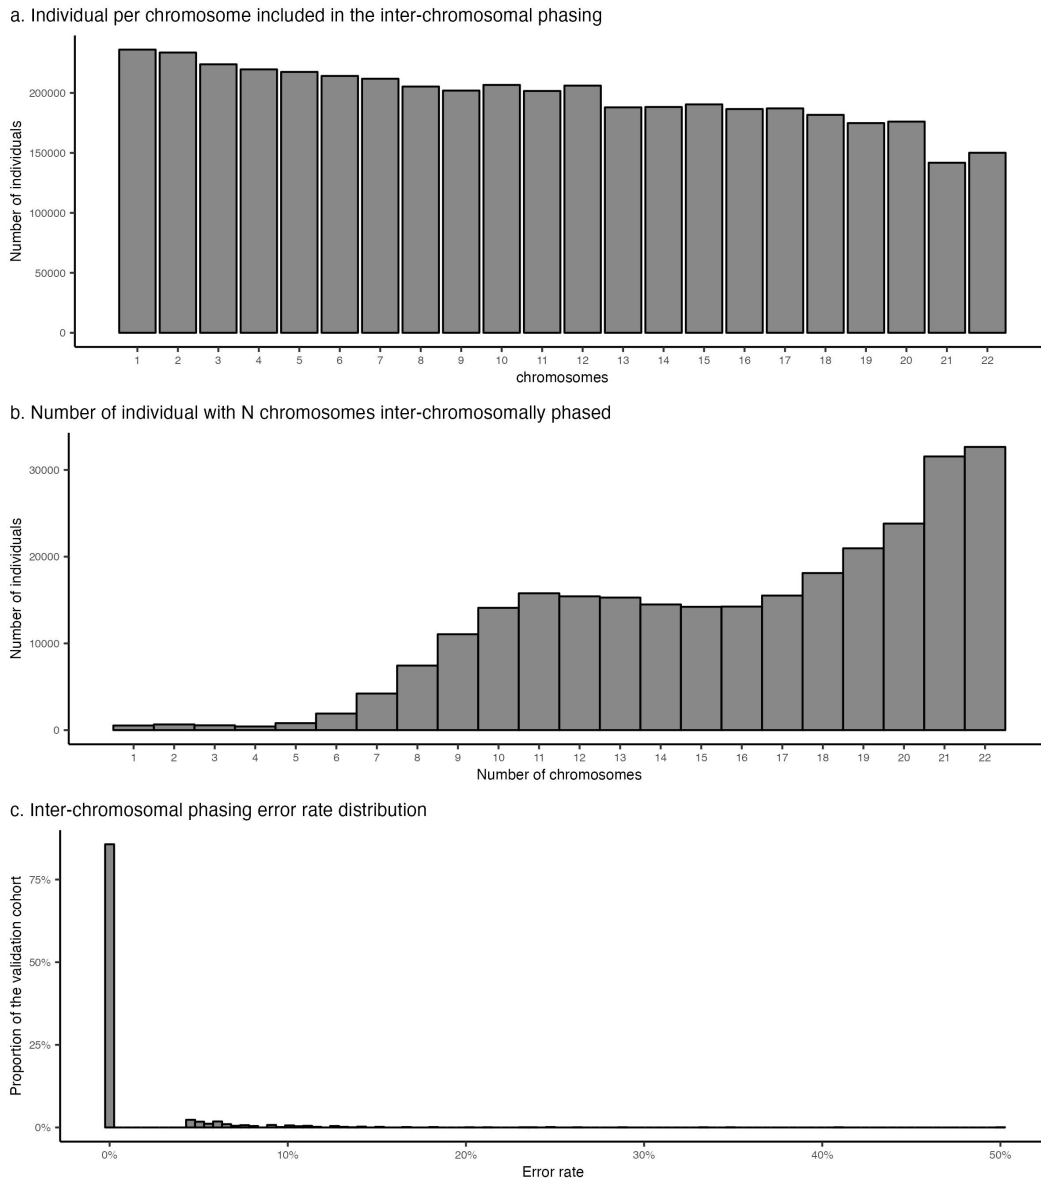

**Supplementary Fig. 3 | Inter-chromosomal phasing from close relative groups.** **a)** Distribution of the number of individuals with a given chromosome included in the inter-chromosomal phasing. The sample sizes vary across chromosomes, as inter-chromosomal phasing requires at least one IBD segment shared with a surrogate parent on the chromosome. Larger chromosomes are more frequently included, likely due to a higher likelihood of containing at least one IBD segment. **b)** Distribution of the number of individuals with N chromosomes (x-axis) successfully included in the inter-chromosomal phasing. Only 12% of individuals (32,651) had all 22 autosomes phased inter-chromosomally. On average, individuals had 16 chromosomes included in inter-chromosomal phasing. **c)** Distribution of inter-chromosomal phasing error rates across individuals in the validation cohort. Error rates were calculated by comparing phasing results based on surrogate parents to the ground truth obtained from available parental genomes. Most individuals (85.6%) were perfectly phased, with an average error rate of only 1.06% for flipped haplotypes, underscoring the robustness and reliability of the inter-chromosomal phasing method in accurately resolving parental haplotype sets.

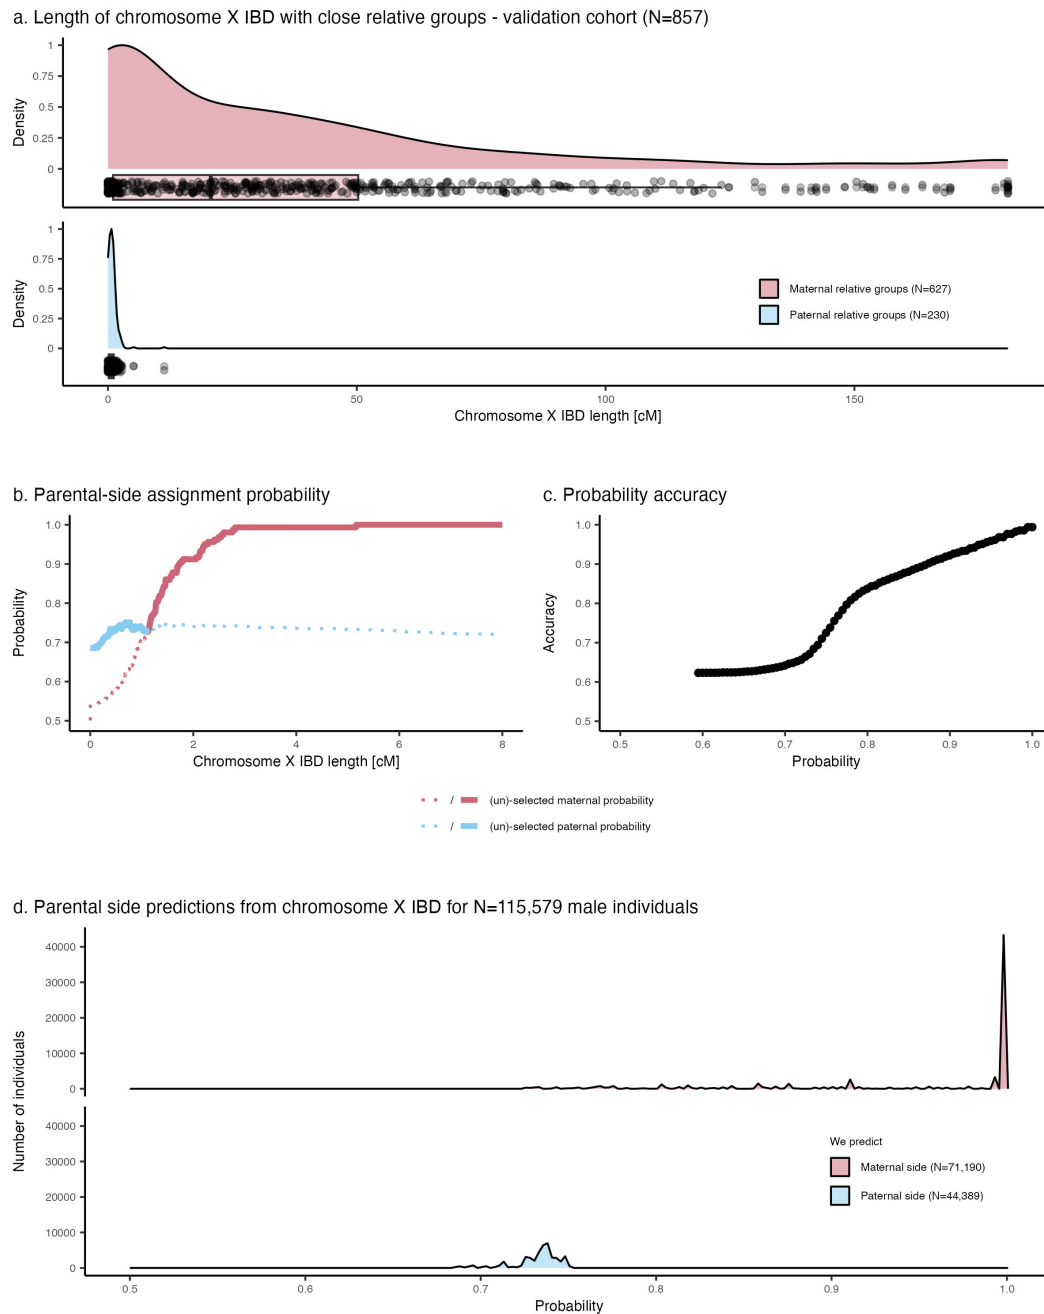

**Supplementary Fig. 4 | Parental side assignment from chromosome X IBD analysis in male individuals.**

**a)** Density distribution of chromosome X IBD segment length in centimorgan (cM) between targets and surrogate father (blue) and targets and surrogate mother (red) across the validation cohort's male individuals. Boxes indicate the interquartile range (IQR), with the bottom and top of the box representing the 25th (Q1) and 75th (Q3) percentiles, respectively. The horizontal line within the box represents the median (50th percentile). Whiskers extend to the smallest and largest values within  $Q1 - 1.5 \times IQR$  and  $Q3 + 1.5 \times IQR$ . Each point represent a target-relative pair. **b)** Parental side probabilities depending on chromosome X IBD segment length derived from the validation cohort. Selected and unselected maternal (red) and paternal (blue) probabilities for a given x-axis value are indicated by solid and dotted lines, respectively. **c)** Accuracy of parental side predictions (y-axis) as a function of the parental side probability (x-axis). **d)** Distribution of maternal (red) and paternal (blue) side assignment probabilities derived chromosome X IBD across 115,579 UK Biobank male individuals.

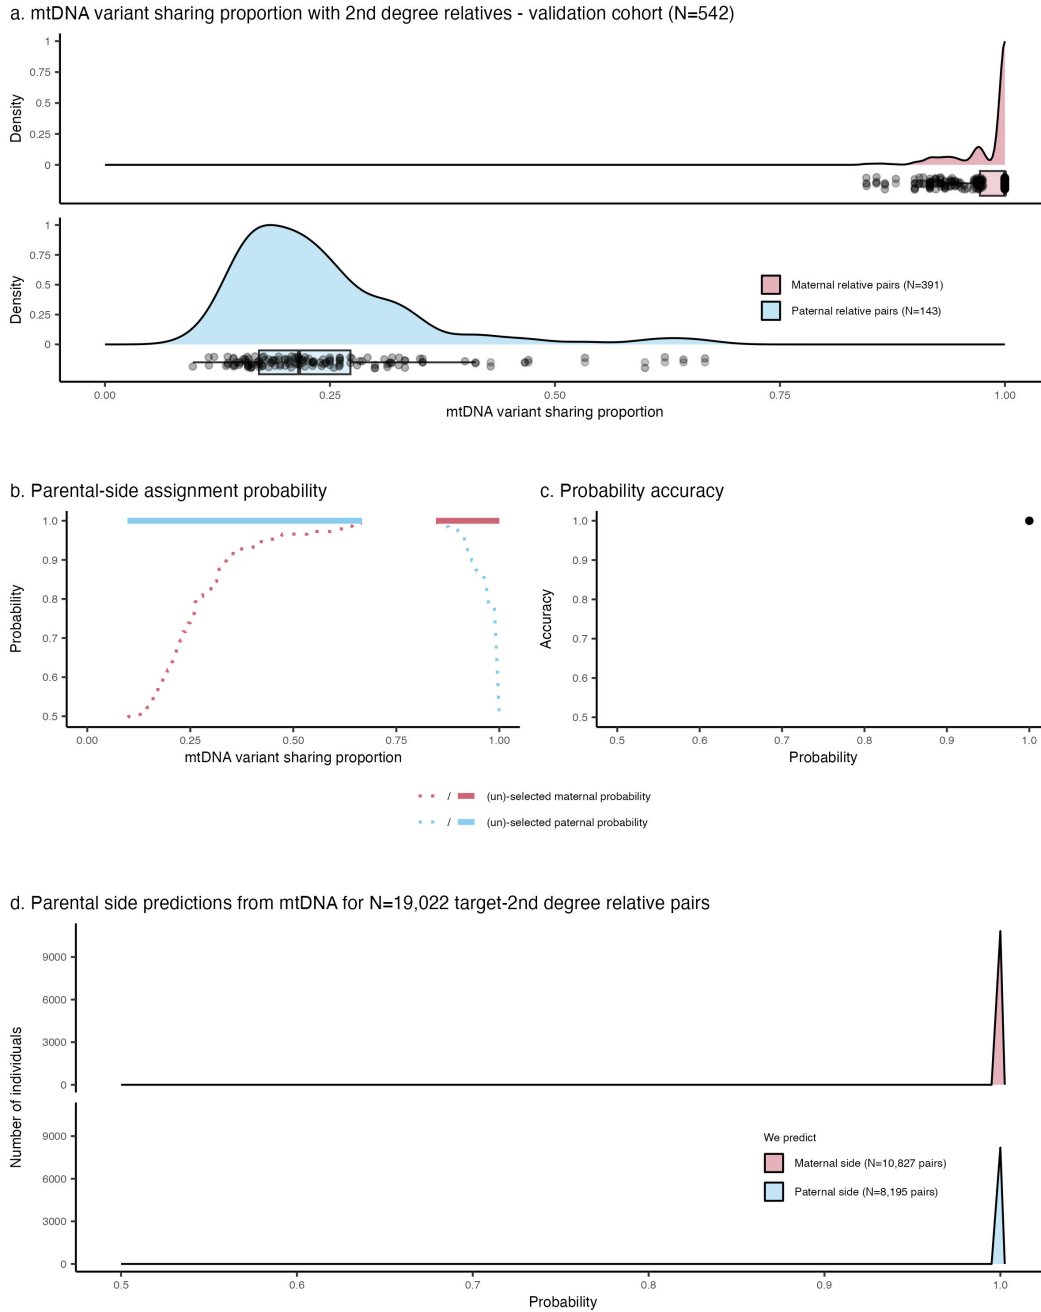

**Supplementary Fig. 5 | Parental side assignment from mitochondrial DNA Minor Variant Sharing (MVS) analysis in 2<sup>nd</sup> degree relative pairs.** **a)** Density distribution of mtDNA Minor Variant Sharing (MVS) between targets and 2<sup>nd</sup> degree surrogate father (blue) and targets and 2<sup>nd</sup> degree surrogate mother (red) across the validation cohort's individuals. Boxes indicate the interquartile range (IQR), with the bottom and top of the box representing the 25th (Q1) and 75th (Q3) percentiles, respectively. The horizontal line within the box represents the median (50th percentile). Whiskers extend to the smallest and largest values within  $Q1 - 1.5 \times IQR$  and  $Q3 + 1.5 \times IQR$ . Each point represent a target-relative pair. **b)** Parental side probabilities depending on mtDNA MVS derived from the validation cohort. Selected and unselected maternal (red) and paternal (blue) probabilities for a given x-axis value are indicated by solid and dotted lines, respectively. **c)** Accuracy of parental side predictions (y-axis) as a function of the parental side probability (x-axis). **d)** Distribution of maternal (red) and paternal (blue) side assignment probabilities derived from mtDNA MVS across 19,022 UK Biobank 2<sup>nd</sup> degree relative pairs.

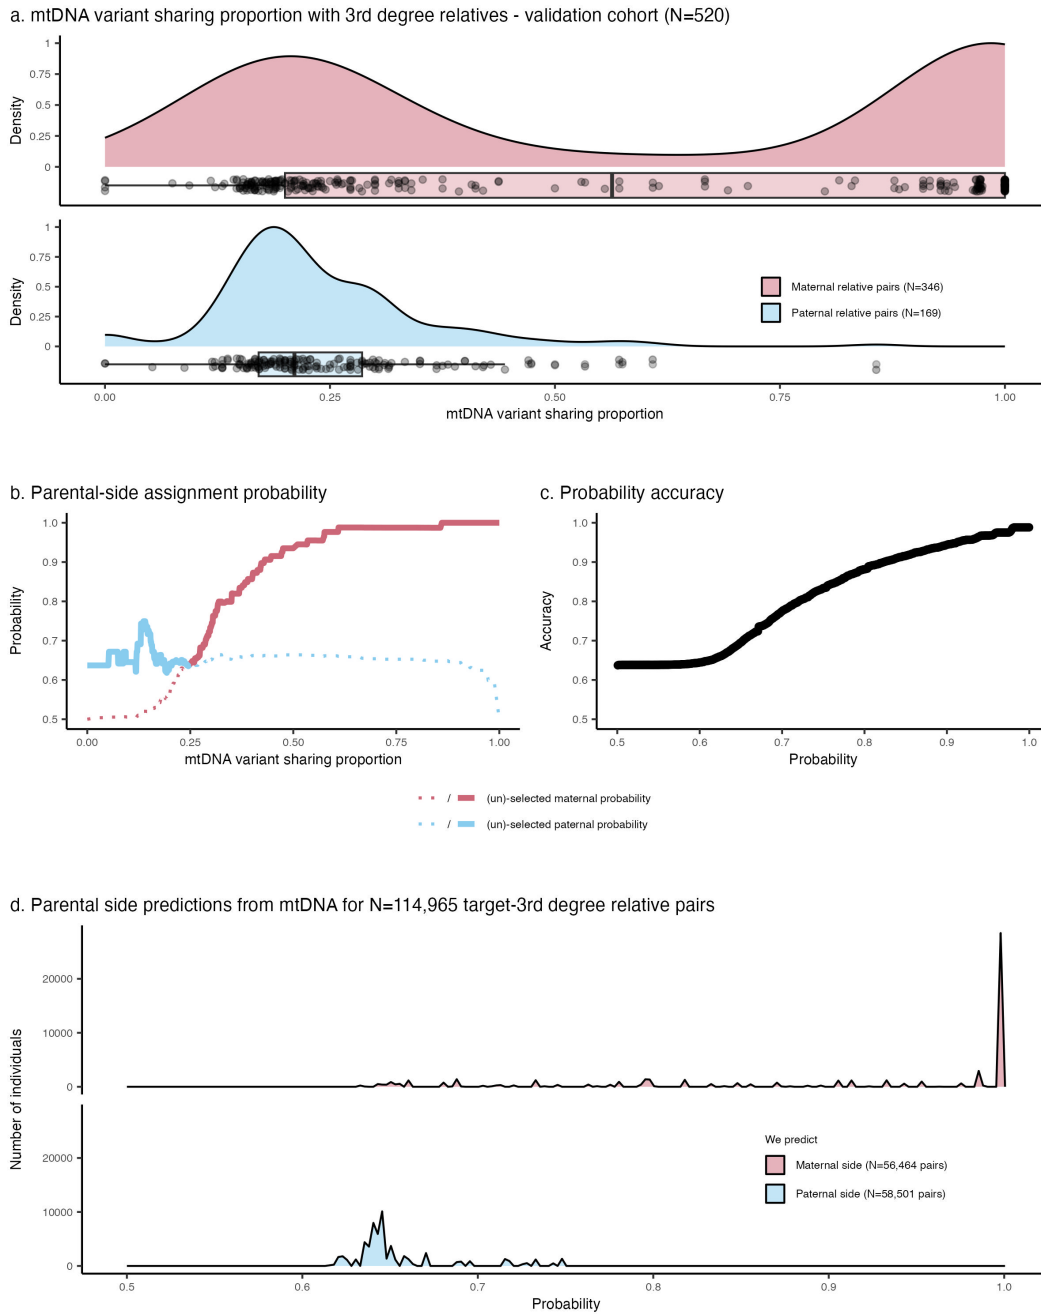

**Supplementary Fig. 6 | Parental side assignment from mitochondrial DNA Minor Variant Sharing (MVS) analysis in 3<sup>rd</sup> degree relative pairs.** **a)** Density distribution of mtDNA Minor Variant Sharing (MVS) between targets and 3<sup>rd</sup> degree surrogate father (blue) and targets and 3<sup>rd</sup> degree surrogate mother (red) across the validation cohort's individuals. Boxes indicate the interquartile range (IQR), with the bottom and top of the box representing the 25th (Q1) and 75th (Q3) percentiles, respectively. The horizontal line within the box represents the median (50th percentile). Whiskers extend to the smallest and largest values within  $Q1 - 1.5 \times IQR$  and  $Q3 + 1.5 \times IQR$ . Each point represent a target-relative pair. **b)** Parental side probabilities depending on mtDNA MVS derived from the validation cohort. Selected and unselected maternal (red) and paternal (blue) probabilities for a given x-axis value are indicated by solid and dotted lines, respectively. **c)** Accuracy of parental side predictions (y-axis) as a function of the parental side probability (x-axis). **d)** Distribution of maternal (red) and paternal (blue) side assignment probabilities derived from mtDNA MVS across 114,965 UK Biobank 3<sup>rd</sup> degree relative pairs.

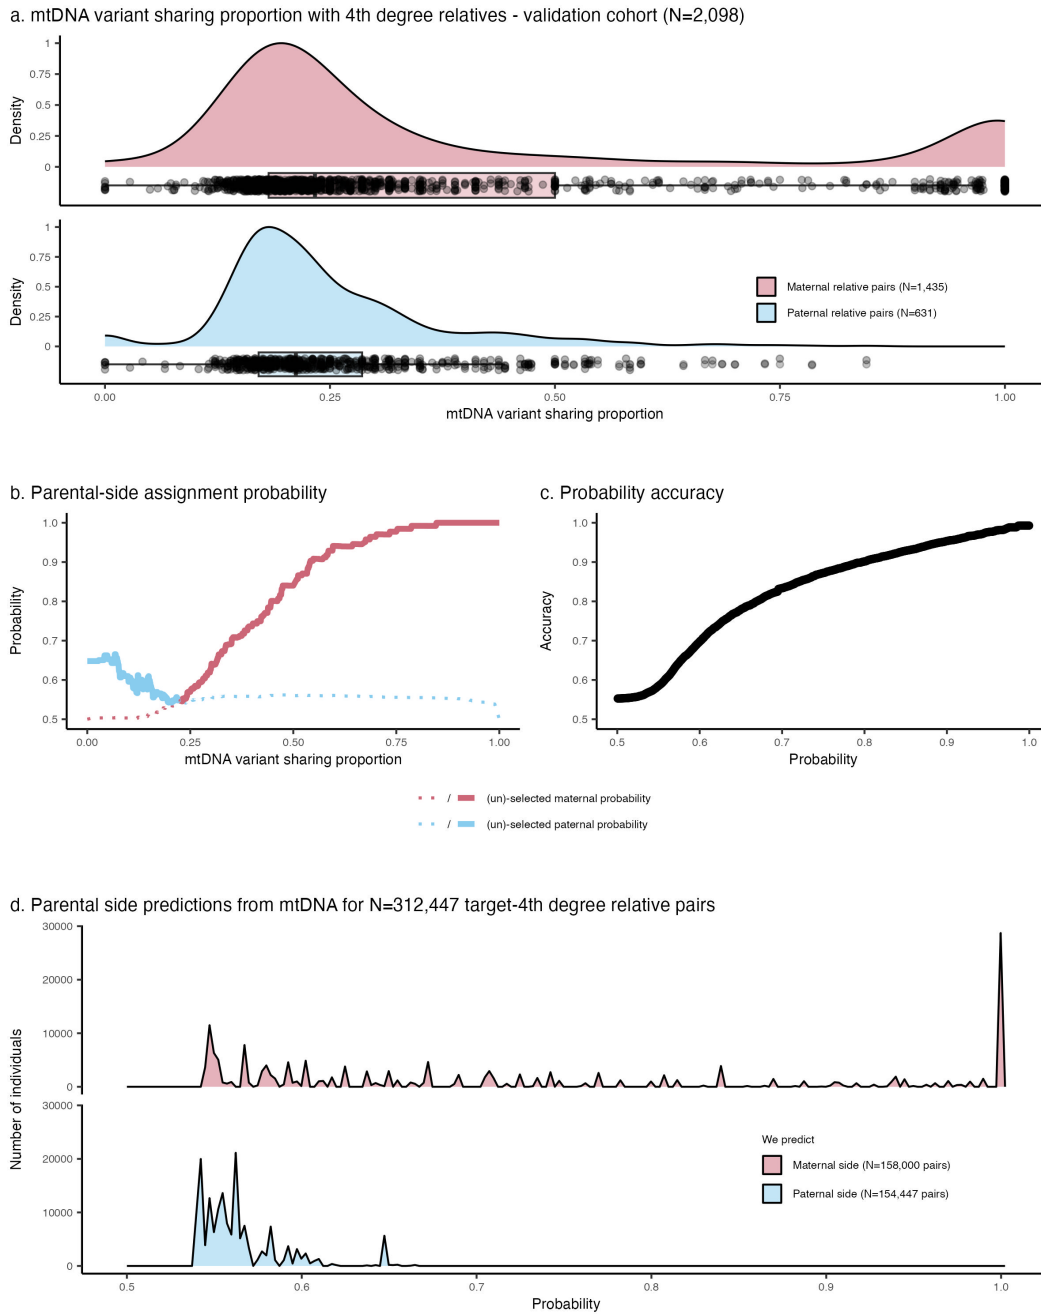

**Supplementary Fig. 7 | Parental side assignment from mitochondrial DNA Minor Variant Sharing (MVS) analysis in 4<sup>th</sup> degree relative pairs.** **a)** Density distribution of mtDNA Minor Variant Sharing (MVS) between targets and 4<sup>th</sup> degree surrogate father (blue) and targets and 4<sup>th</sup> degree surrogate mother (red) across the validation cohort's individuals. Boxes indicate the interquartile range (IQR), with the bottom and top of the box representing the 25th (Q1) and 75th (Q3) percentiles, respectively. The horizontal line within the box represents the median (50th percentile). Whiskers extend to the smallest and largest values within  $Q1 - 1.5 \times IQR$  and  $Q3 + 1.5 \times IQR$ . Each point represent a target-relative pair. **b)** Parental side probabilities depending on mtDNA MVS derived from the validation cohort. Selected and unselected maternal (red) and paternal (blue) probabilities for a given x-axis value are indicated by solid and dotted lines, respectively. **c)** Accuracy of parental side predictions (y-axis) as a function of the parental side probability (x-axis). **d)** Distribution of maternal (red) and paternal (blue) side assignment probabilities derived from mtDNA MVS across 312,447 UK Biobank 4<sup>th</sup> degree relative pairs.

A. mtDNA probability distribution for 316,700 target-relative pairs

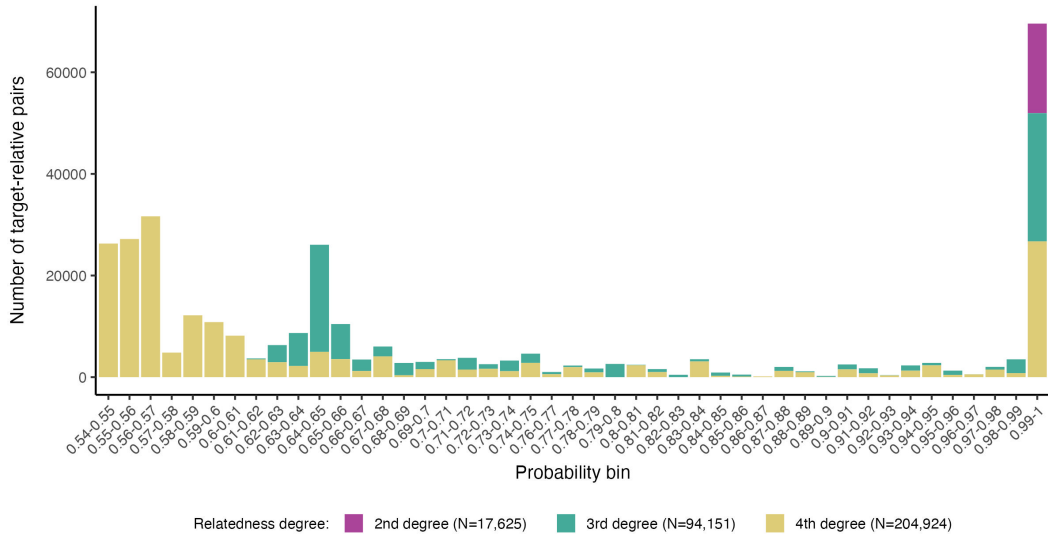

B. Number of relatives supporting the same parental assignment

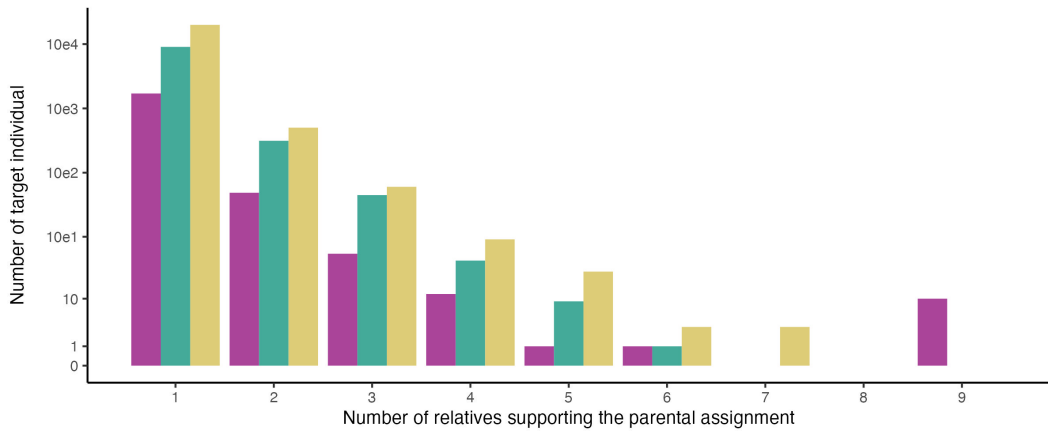

**Supplementary Fig. 8 | Selection of mitochondrial DNA (mtDNA) Minor Variant Sharing (MVS) predictors for parental side assignments. a)** Distribution of parental side assignment probabilities for 316,700 target-relative pairs, stratified by relatedness degree (2<sup>nd</sup>, 3<sup>rd</sup>, and 4<sup>th</sup> degree). For individuals with multiple relatives of the same degree, only the relative with the highest predicted accuracy was retained. Probabilities are binned at intervals of 0.01 for visualization. **b)** Log-scale distribution of the number of target individuals (y-axis) based on the number of relatives (x-axis) supporting the same parental side assignment, further stratified by degree of relatedness.

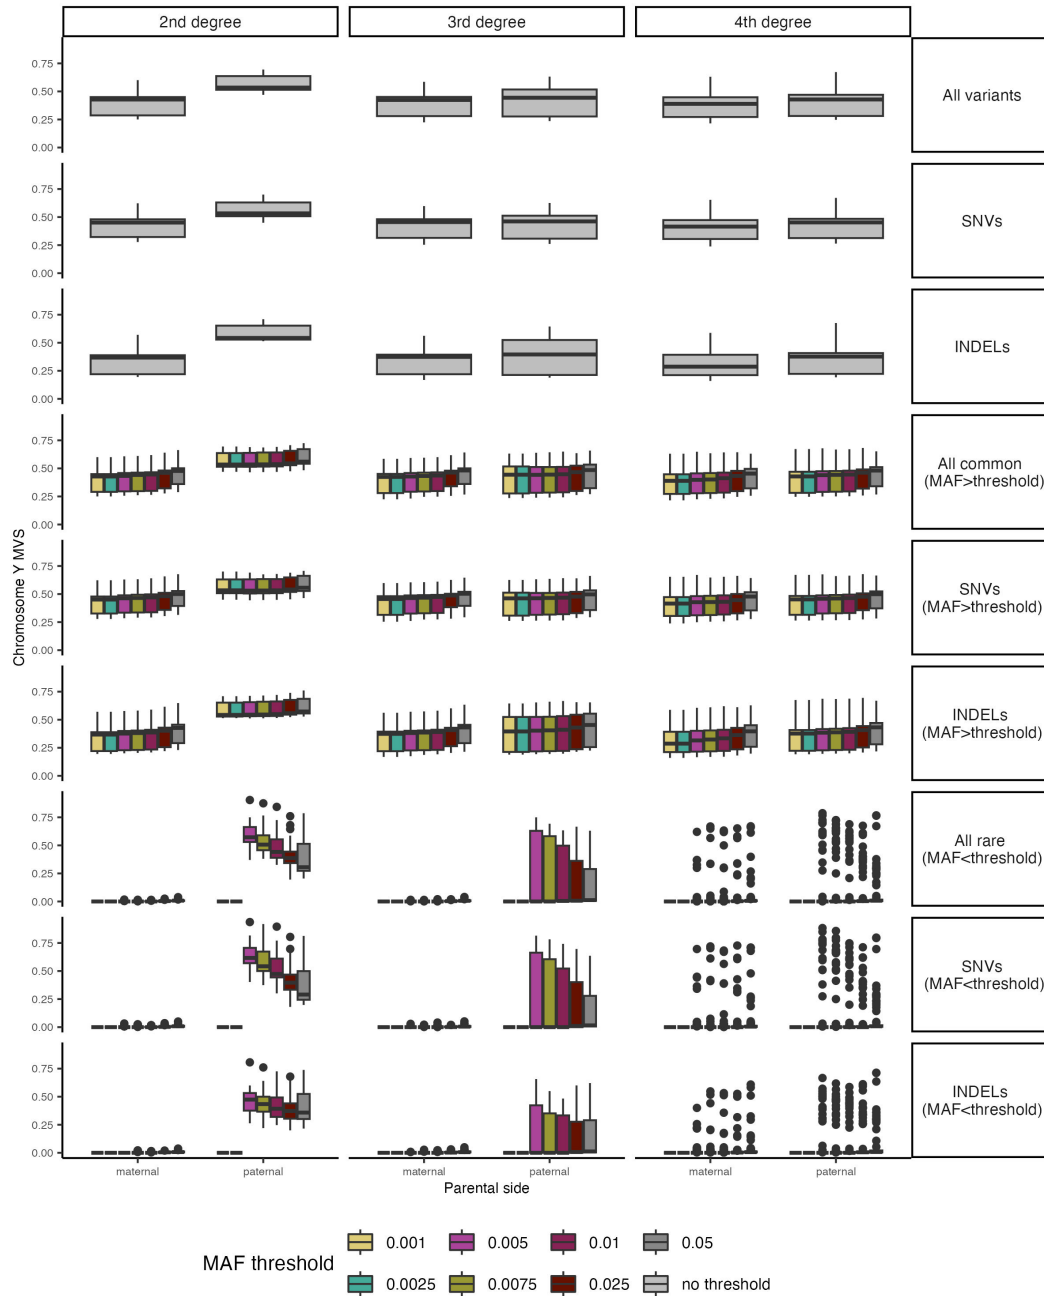

**Supplementary Fig. 9 | Chromosome Y Minor Variant Sharing (MVS) analysis.** The y-axis represents the proportion of chromosome Y minor variants shared (MVS), stratified by parental side assignments (maternal or paternal, x-axis), relatedness degrees (columns: 2<sup>nd</sup>, 3<sup>rd</sup>, and 4<sup>th</sup> degree), variant categories (rows), and minor allele frequency (MAF) thresholds (color-coded). Categories include all variants, single nucleotide variants (SNVs), insertions/deletions (INDELs), common variants (MAF > threshold), and rare variants (MAF < threshold). The MAF thresholds are denoted in the legend for clearer distinction of variant frequencies.



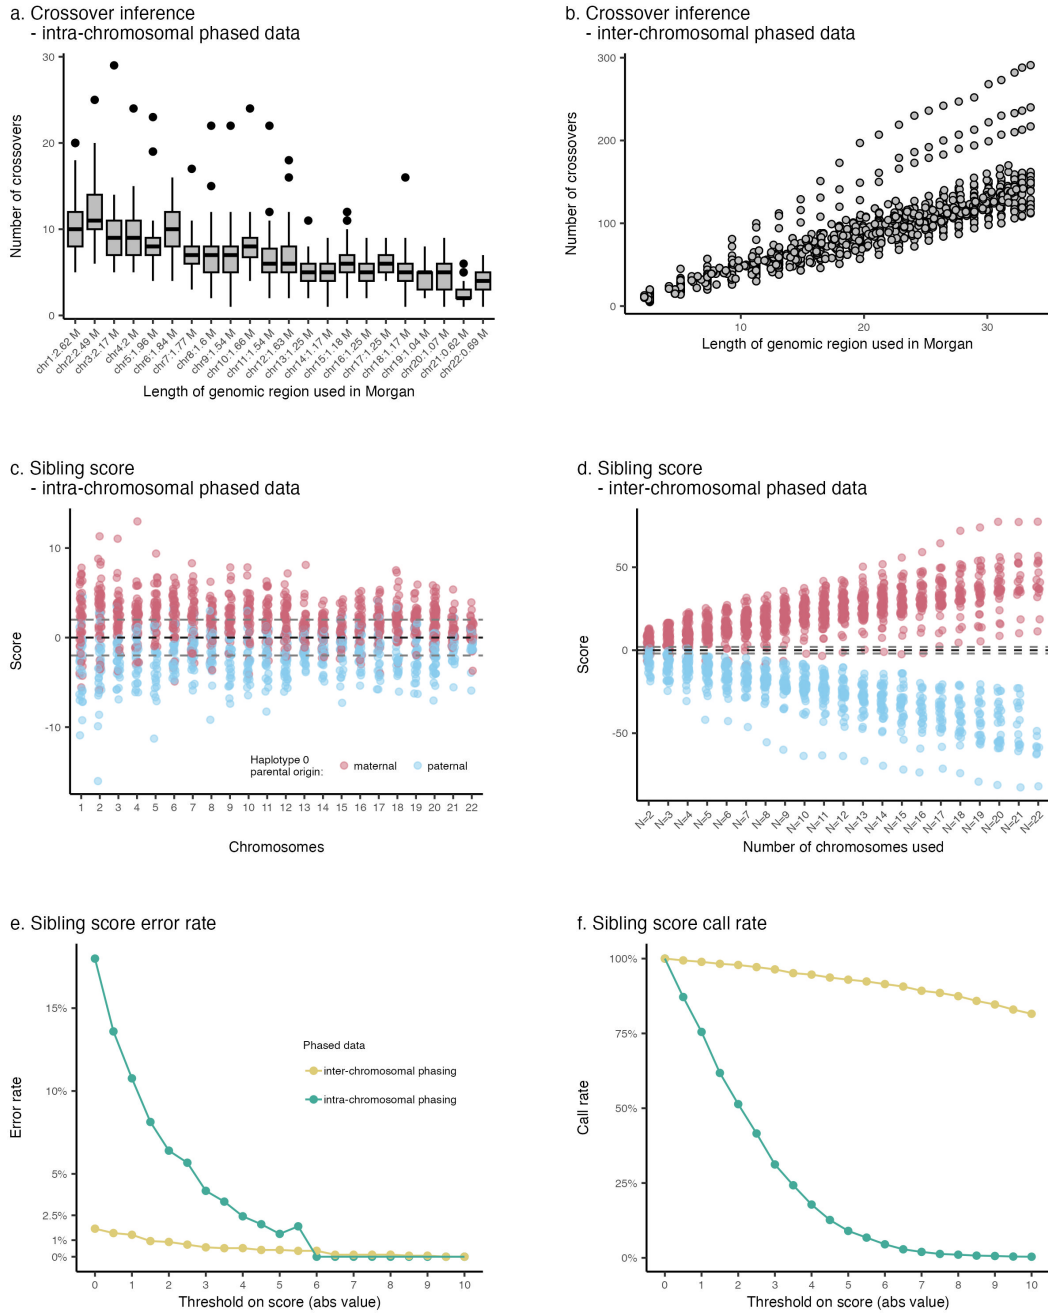

**Supplementary Fig. 10 | Evaluation of sibling scores from intra- and inter-chromosomal phasing in N=88 individuals of the validation cohort.** **a)** Distribution of the number of inferred crossovers (y-axis) per chromosome (x-axis) derived from intra-chromosomally phased data. **b)** Distribution of the number of inferred crossovers (y-axis) relative to the genomic length used (in Morgans, x-axis) derived from inter-chromosomally phased data. **c)** Distribution of sibling scores (y-axis) per chromosome (x-axis) using intra-chromosomally phased data. Maternal and paternal haplotypes are color-coded in red and blue, respectively. **d)** Distribution of sibling scores (y-axis) relative to the number of chromosomes included in inter-chromosomally phased data (x-axis). **e)** Error rates (y-axis) of sibling scores for varying score thresholds (absolute values, x-axis). For example, excluding ambiguous scores between -2 and 2 reduced error rates to 1.4% with inter-chromosomal phasing, compared to 6.4% with intra-chromosomal phasing. **f)** Call rates (y-axis) of sibling scores for varying score thresholds (absolute values, x-axis), showing the proportion of individuals meeting the threshold criteria.

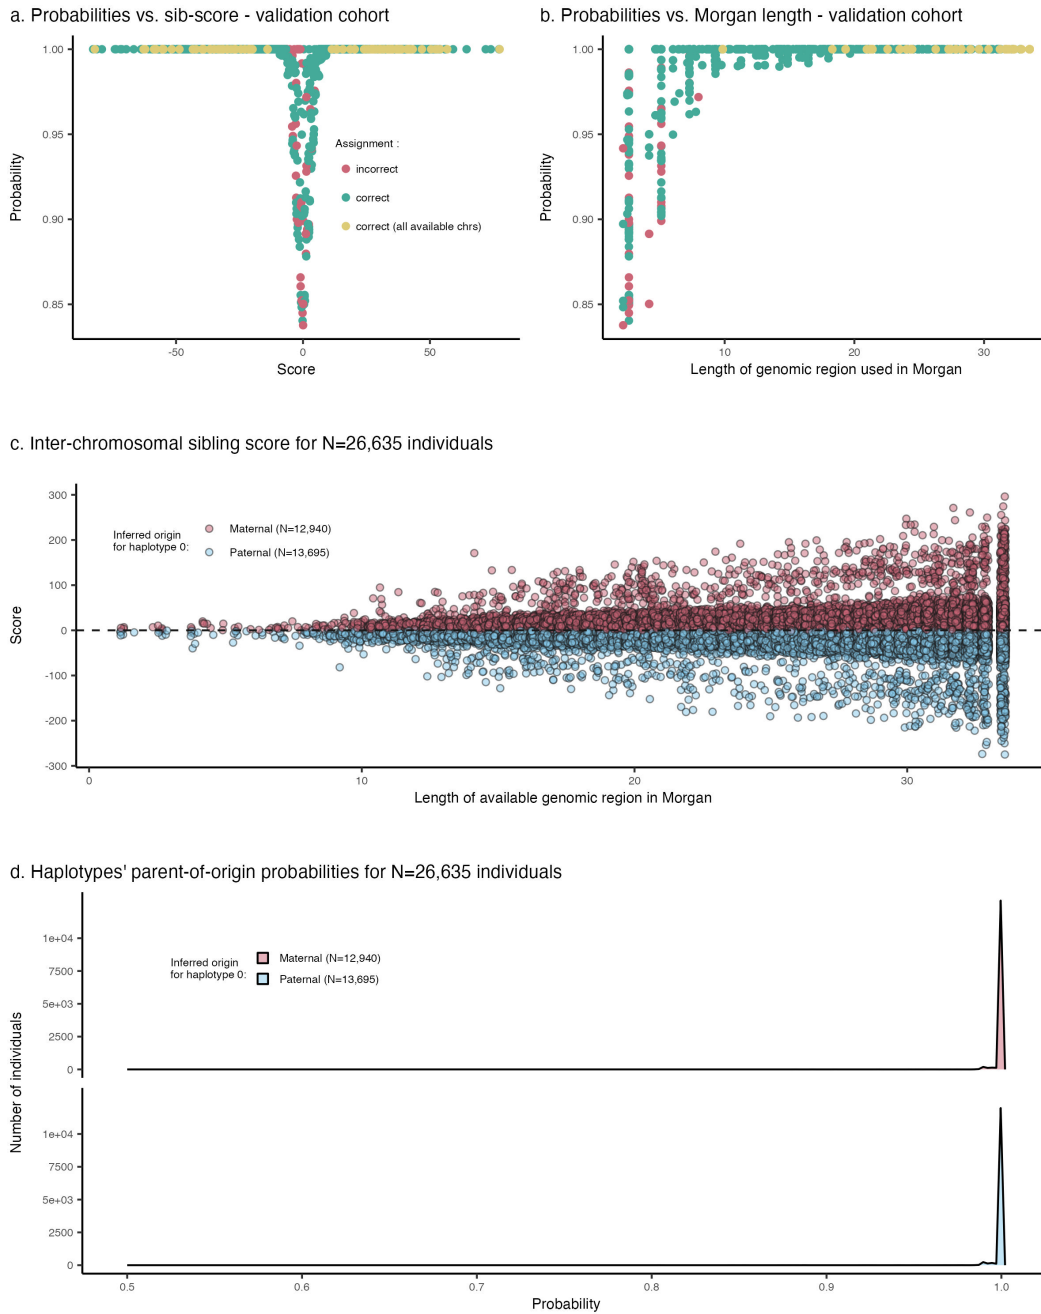

**Supplementary Fig. 11 | Validation and derivation of parent-of-origin probabilities using sibling scores from inter-chromosomal phased data.** **a)** PofO probabilities (y-axis) as a function of sibling scores (x-axis) in the validation cohort. Each dot represents a specific configuration (an individual with a given number of chromosomes used). We varied the number of chromosome used per individual to assess the accuracy of different configurations (see Supplementary Figure ??D). Red dots indicate incorrect parental assignments, green dots indicate correct assignments, and yellow dots denote correct assignments using the maximum available chromosomes ( $N_{max}$ , corresponds to the full set of inter-chromosomally phased chromosome for a given individual). No errors were observed when  $N_{max}$  chromosomes were used. **b)** PofO probabilities (y-axis) plotted against the total available genomic length in Morgans (x-axis) for sibling score calculation in the validation cohort. Each configuration is represented as a dot (color-coded as in panel a). Increasing genomic length results in higher assignment accuracy, with perfect accuracy achieved at  $N_{max}$  (yellow dots). **c)** Sibling scores (y-axis) derived for N=26,635 individuals across available genomic lengths (x-axis). Most configurations (99.5%) cover more than 10 Morgans and include over 30 inferred crossover events, ensuring high assignment accuracy (as indicated in the validation panels a and b). **d)** Distribution of PofO probabilities for 26,635 individuals. A majority of individuals (>95%) exhibit probabilities of 1, resulting in perfect accuracy within the validation cohort (see yellow dots in panel a).

a. Intra-chromosomal sib-score for N=14,597 individuals

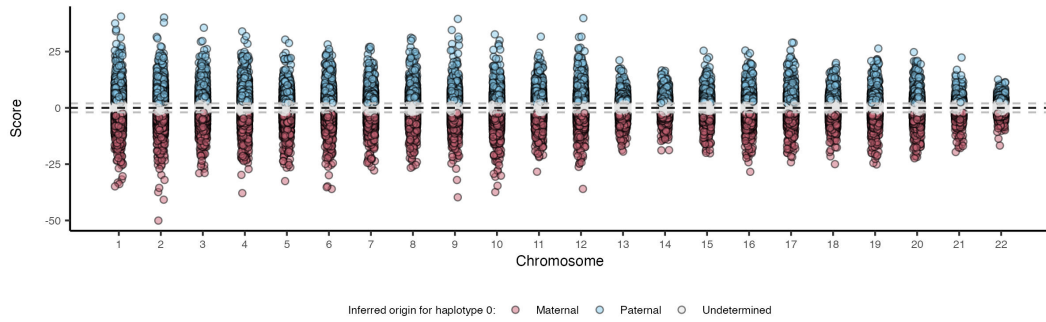

b. Distribution of parent-of-origin determination per chromosome for N=14,597 individuals

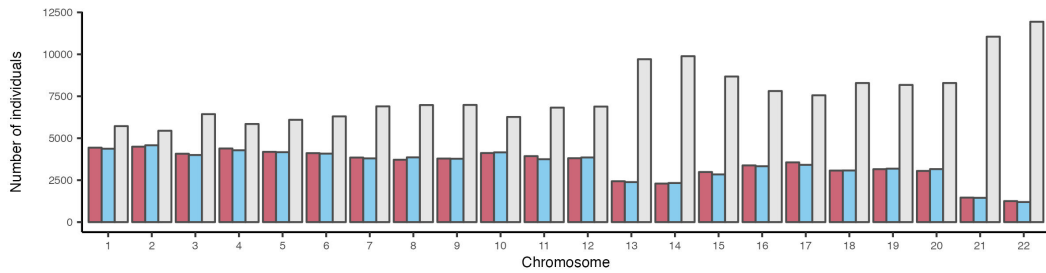

c. Distribution of individuals per number of chromosomes inferred for N=14,597 individuals

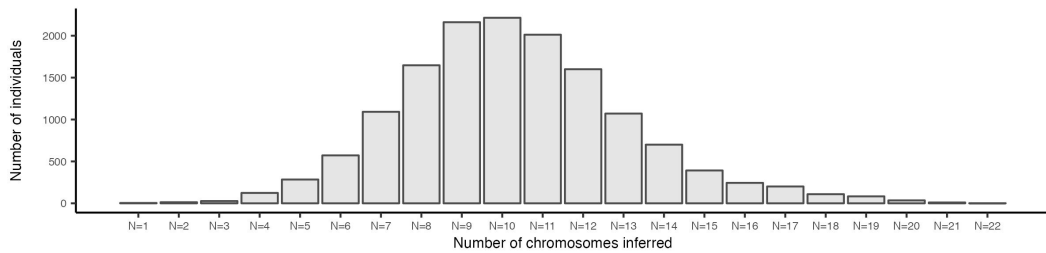

**Supplementary Fig. 12 | Derivation of parent-of-origin probabilities using sibling scores from intra-chromosomal phased data.** **a)** Sibling scores calculated for each chromosome independently (x-axis). Each dot corresponds to a single chromosome, with blue and red dots indicating paternal and maternal assignment, respectively, for the first haplotype. Undetermined assignments are shown in gray. **b)** Distribution of the number of individuals (y-axis) with inferred PofO for each chromosome (x-axis). Larger chromosomes exhibit higher numbers of PofO inference (e.g., 8,811 individuals for chromosome 1), while smaller chromosomes show fewer inferences (e.g., 2,450 individuals for chromosome 22), reflecting the increased likelihood of crossovers on larger chromosomes. **c)** Distribution of the number of chromosomes with inferred PofO per individual (x-axis), with counts shown on the y-axis. On average, individuals have 10.3 chromosomes with PofO inferred. This is lower compared to the average of 16 chromosomes inferred using inter-chromosomal phasing (see Supplementary Figure ??B).

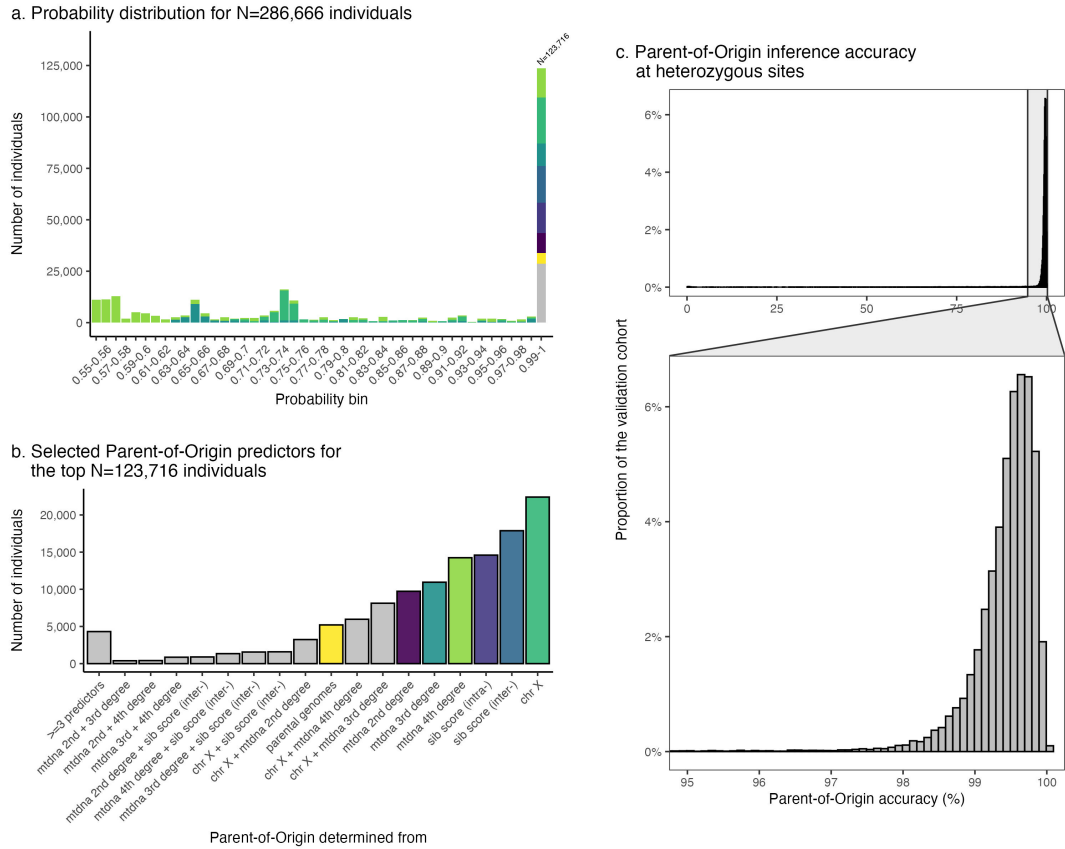

**Supplementary Fig. 13 | Selected parent-of-origin predictors and error rate.** **a)** Distribution of PofO probabilities for N=286,666 individuals. The x-axis represents probability bins, and the y-axis shows the number of individuals. Colors correspond to the predictors used for PofO determination, as indicated in panel (b). **b)** Distribution of selected PofO predictors for individuals having a PofO probability greater than 0.99. **c)** Distribution of the PofO inference accuracy. Errors were computed at heterozygous site only by comparing the PofO determined using our approach to the one obtained from parental genomes. We found an average accuracy of 97.94%. This rate is impacted by individuals for which entire haplotypes are incorrect, resulting from inter-chromosomal phasing errors, totaling 64 haplotypes (in the validation cohort). These are likely due to the presence of relatives sharing both paternal and maternal IBD segments, which may be due to consanguinity, and were not filtered out during the construction of the validation cohort. As a result, only a few individuals' haplotypes decrease the global accuracy, and most individuals have a PofO correctly assigned. Indeed, the majority of haplotypes (83.9%) exhibit accuracy above 99%, and half of the haplotypes have more than 0.52% accuracy.

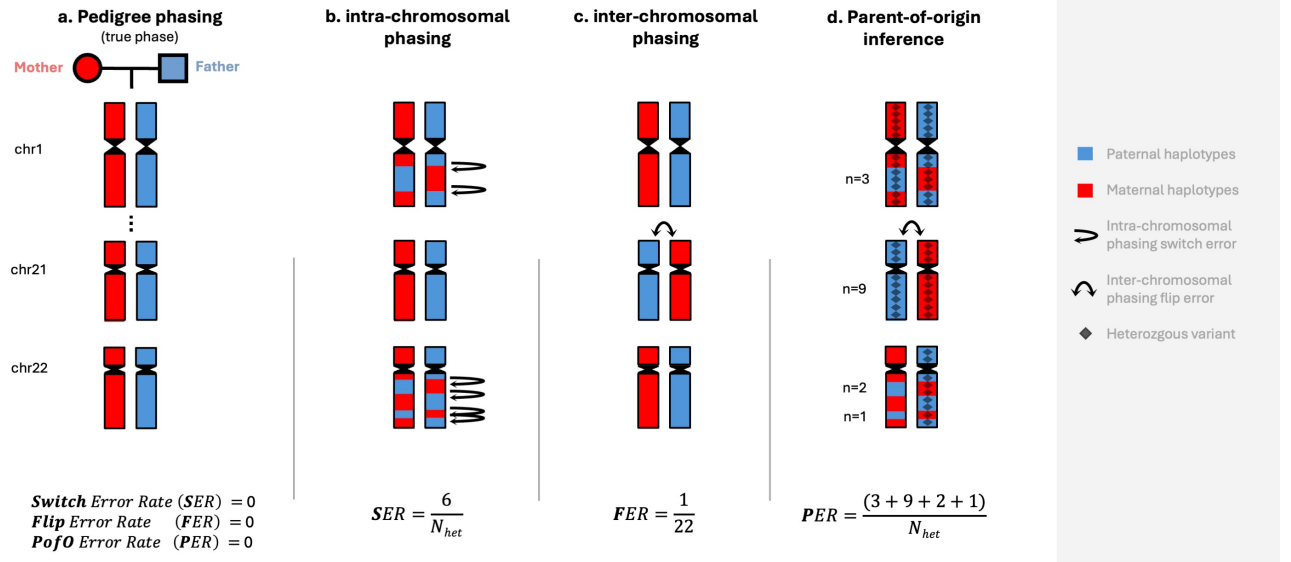

**Supplementary Fig. 14 | Illustration of errors in statistical methods.** **a)** A perfectly phased individual (both intra- and inter-chromosomally). Phasing is performed using the parental genomes: maternal (red) and paternal (blue). In this scenario, the PofO is directly inferred alongside the phasing process without errors. **b)** An individual with intra-chromosomal phasing errors introduced by traditional phasing software (e.g., SHAPEIT5<sup>1</sup>). These errors are represented as switches between parental haplotypes within the same chromosome (horizontal arrows), with 6 switches shown here. Since switches occur only at heterozygous sites, the switch error rate (SER) is calculated as  $SER = 6/N_{het}$ , where  $N_{het}$  is the total number of heterozygous sites. **c)** An individual with inter-chromosomal phasing errors but assumed perfect intra-chromosomal phasing (no switches within the same chromosome). Errors in this case are represented as flips of entire parental haplotypes across chromosomes (vertical arrow), with one flip shown here. The flip error rate (FER) is calculated as the proportion of chromosomes flipped relative to the majority, ranging from 0% to 50%. **d)** An individual with combined intra- and inter-chromosomal phasing errors. PofO inference errors aggregate contributions from both switch and flip errors. The PofO error rate (PER) is computed as the proportion of heterozygous sites (grey diamonds) incorrectly assigned. For example, in this scenario, assigning the first haplotype as maternal and the second as paternal results in a total of 15 errors.

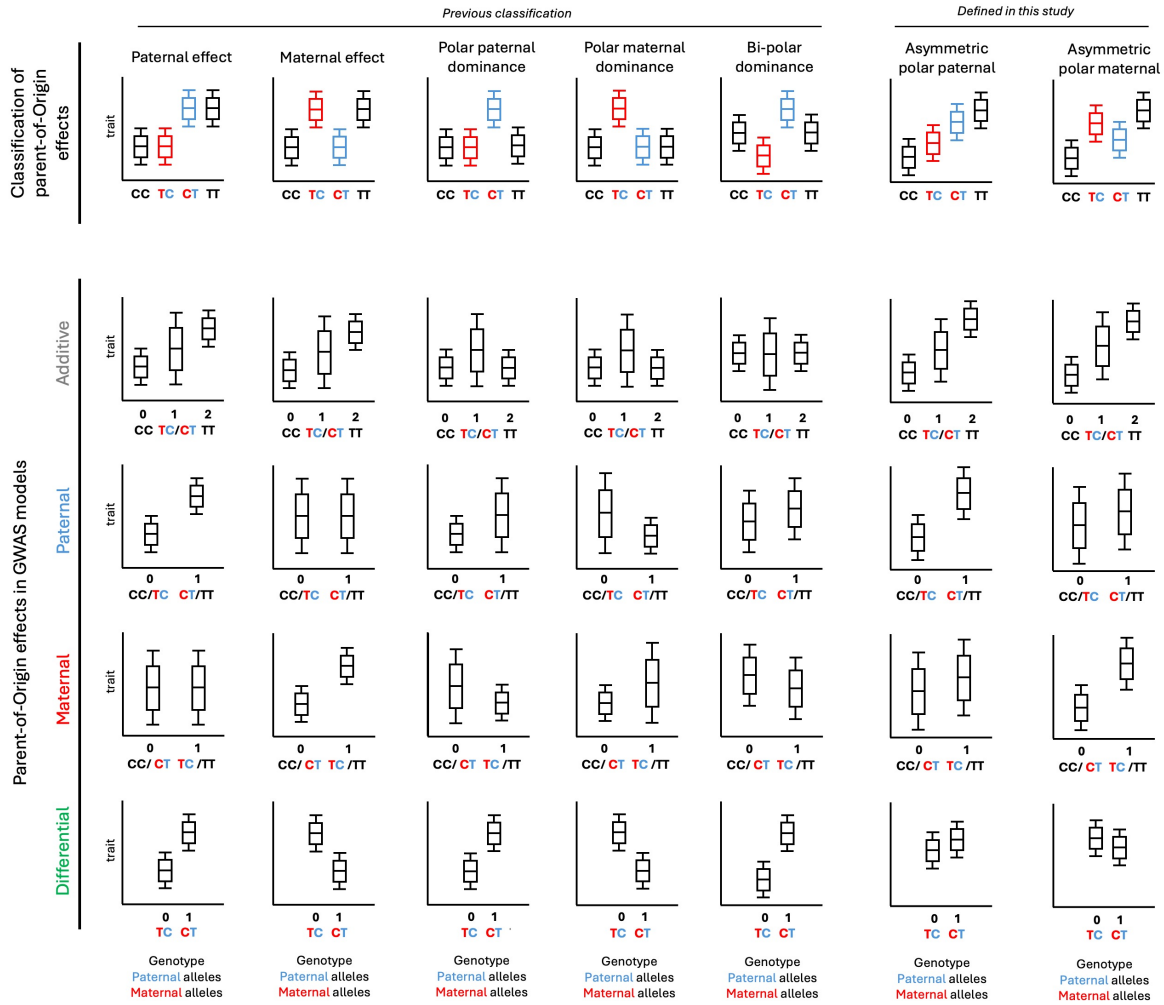

**Supplementary Fig. 15 | Classification and detection of parent-of-origin effects in GWAS.** Top panel illustrates the classification of POEs<sup>2</sup> and shows the variation in trait values (y-axis) across genotypes and parental origin of alleles (x-axis). Maternal alleles are shown in red, and paternal alleles are shown in blue. Boxplots represent the distribution of trait values for different genotypes: black boxes for homozygotes, red boxes for maternal heterozygotes, and blue boxes for paternal heterozygotes. Each boxplot includes the 25th, 50th (median), and 75th percentiles, with whiskers extending to the minimum and maximum values. **Bottom panels** show the interpretation of the different POEs (x-axis) using various GWAS models (y-axis), including additive, paternal, maternal, and differential models. In this study, we identified POEs using the differential GWAS model.

a. Original Parent-of-Origin associations on standing height

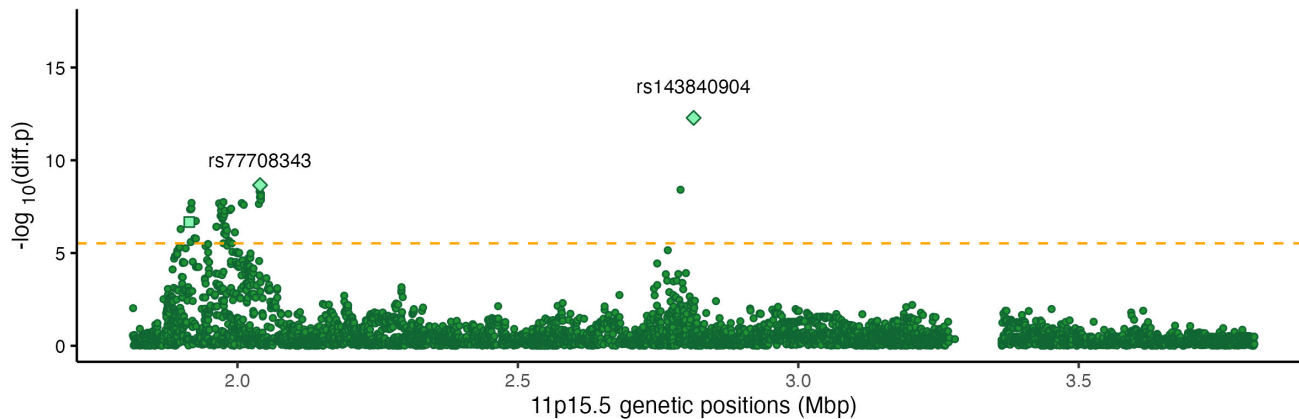

b. Conditional Parent-of-Origin associations on standing height

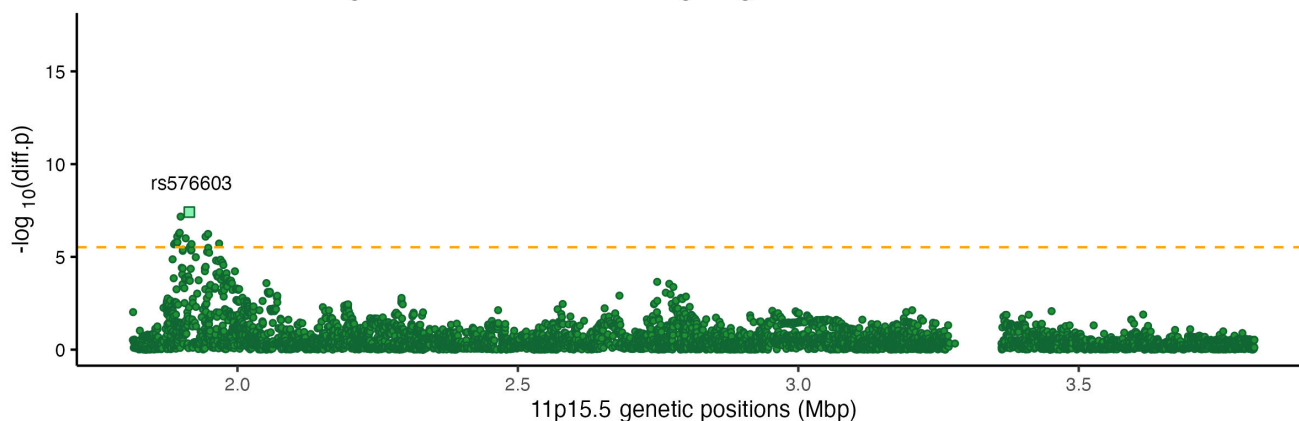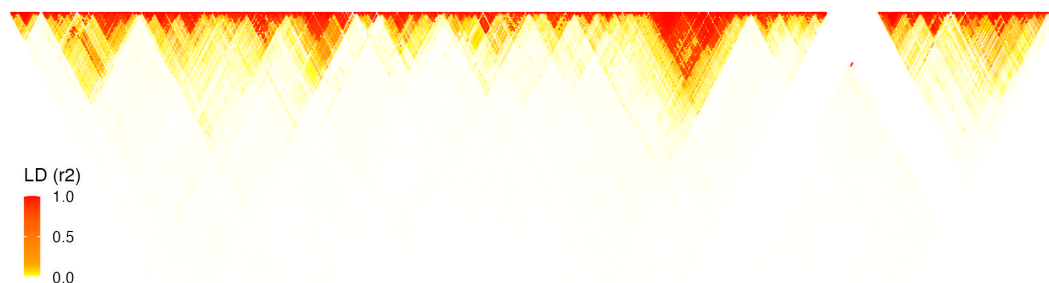

**Supplementary Fig. 16 | Conditional analysis on standing height at 11p15.5.** a) Original, and b) Conditional differential GWAS show the association strength ( $-\log_{10}(p - \text{value})$ , y-axis) against the genomic position (x-axis) at the 11p15.5 region. Each point represents a genetic variant. Diamonds indicate the variants with independent, significant POE on standing height found in this study in the primary GWAS scan. The square represents the variant with significant and independent POE identified in the conditional analysis. Orange dashed lines represent the significance threshold used in this study when focusing on imprinted regions ( $3.1 \times 10^{-06}$ ). Bottom panel shows the Linkage Disequilibrium (LD) pattern, ranging from LD=0 (white) to LD=1 (red).



a. Parent-of-origin effect at 11p15.5

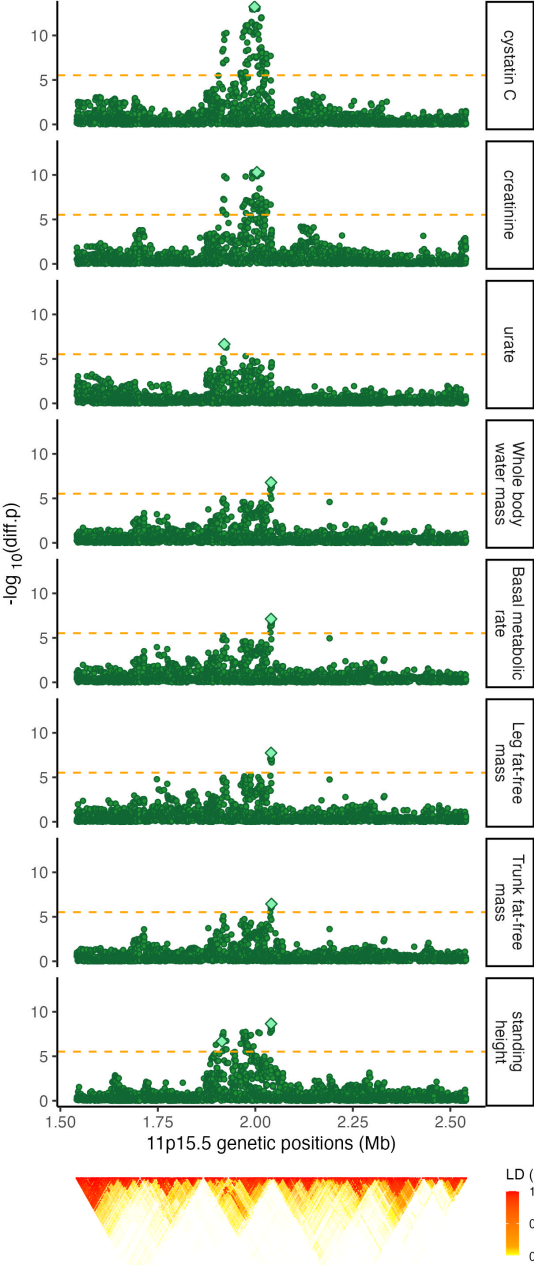

b. Co-localization at 11p15.5

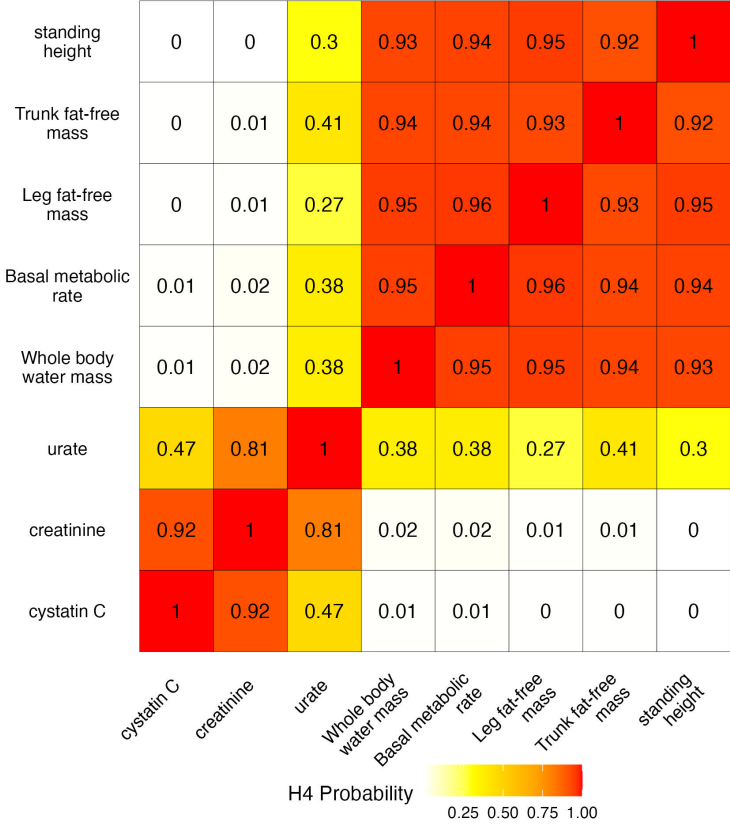

**Supplementary Fig. 17 | Co-localization analyses at 11p15.5.** a) Parent-of-origin associations across traits at 11p15.5 show the differential GWAS association strength ( $-\log_{10}(p - value)$ , y-axis) against the genomic position (x-axis). Orange dashed lines represent the significance threshold used in this study when focusing on imprinted regions ( $3.1 \times 10^{-6}$ ). Each point represents a genetic variant. Light green diamonds shows lead POE reported in Table ?? b) Co-localization probability heatmap (i.e, shared causal variant probability  $H_4$ ).



a. Original Parent-of-Origin associations on hip circumference

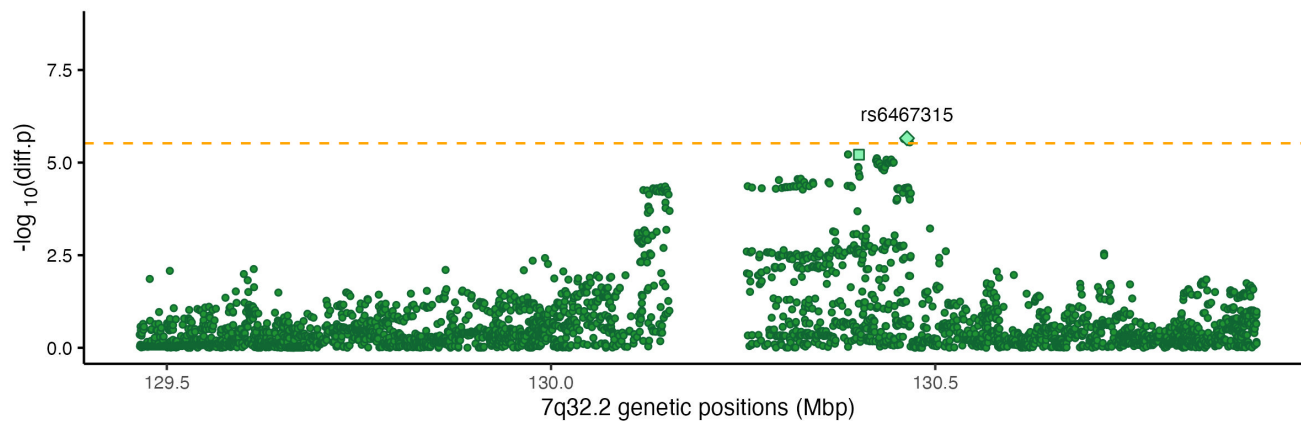

b. Conditional Parent-of-Origin associations on hip circumference

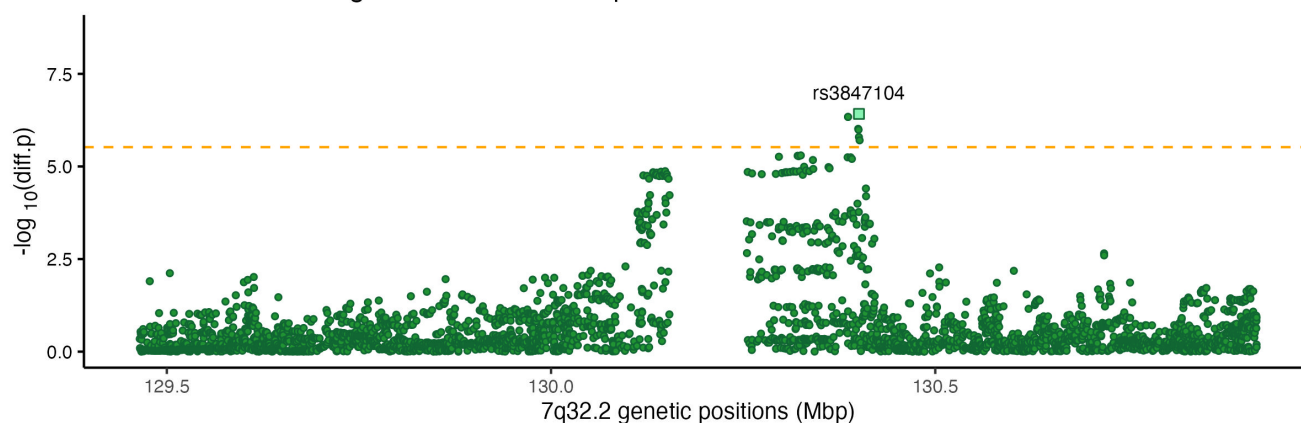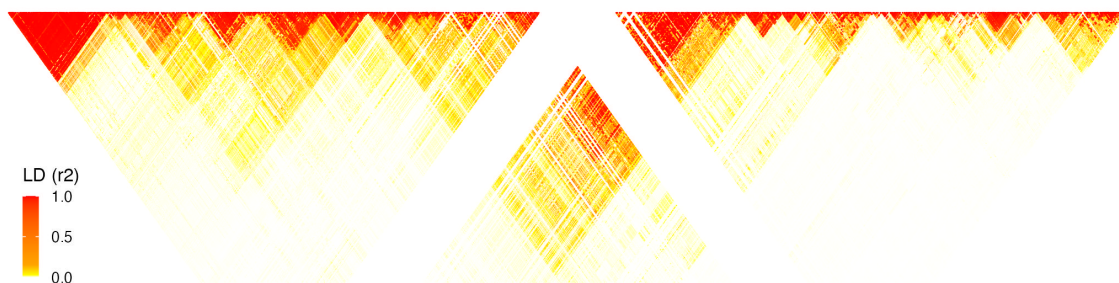

**Supplementary Fig. 18 | Conditional analysis on hip circumference at 7q32.2.** a) Original, and b) Conditional differential GWAS show the association strength ( $-\log_{10}(p\text{-value})$ , y-axis) against the genomic position (x-axis) at the 7q32.2 region. Each point represents a genetic variant. The diamond indicates the variant with significant POE on hip circumference found in this study in the primary GWAS scan. The square indicates the variant with significant and independent POE identified in the conditional analysis. Orange dashed lines represent the significance threshold used in this study when focusing on imprinted regions ( $3.1 \times 10^{-6}$ ). Bottom panel shows the Linkage Disequilibrium (LD) pattern, ranging from LD=0 (white) to LD=1 (red).

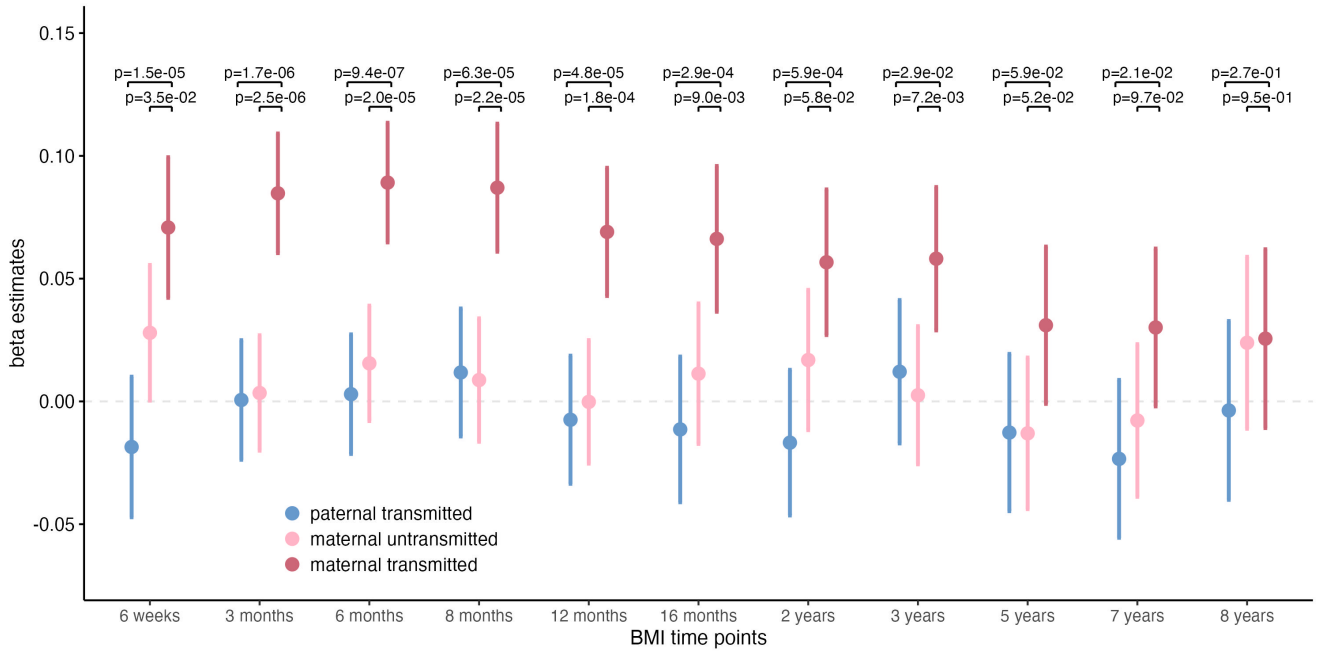

**Supplementary Fig. 19 | Parent-of-origin effects of rs6467315 on different BMI time points.** Beta estimates and 95% confidence intervals (y-axis) of paternal transmitted (blue), maternal transmitted (red) and maternal untransmitted (pink) alleles effects on different BMI time points (x-axis). We assessed the differences in effects between (i) maternal and paternal transmitted alleles and (ii) maternal transmitted and untransmitted alleles using a Z-score approach, analogous to a differential GWAS test.

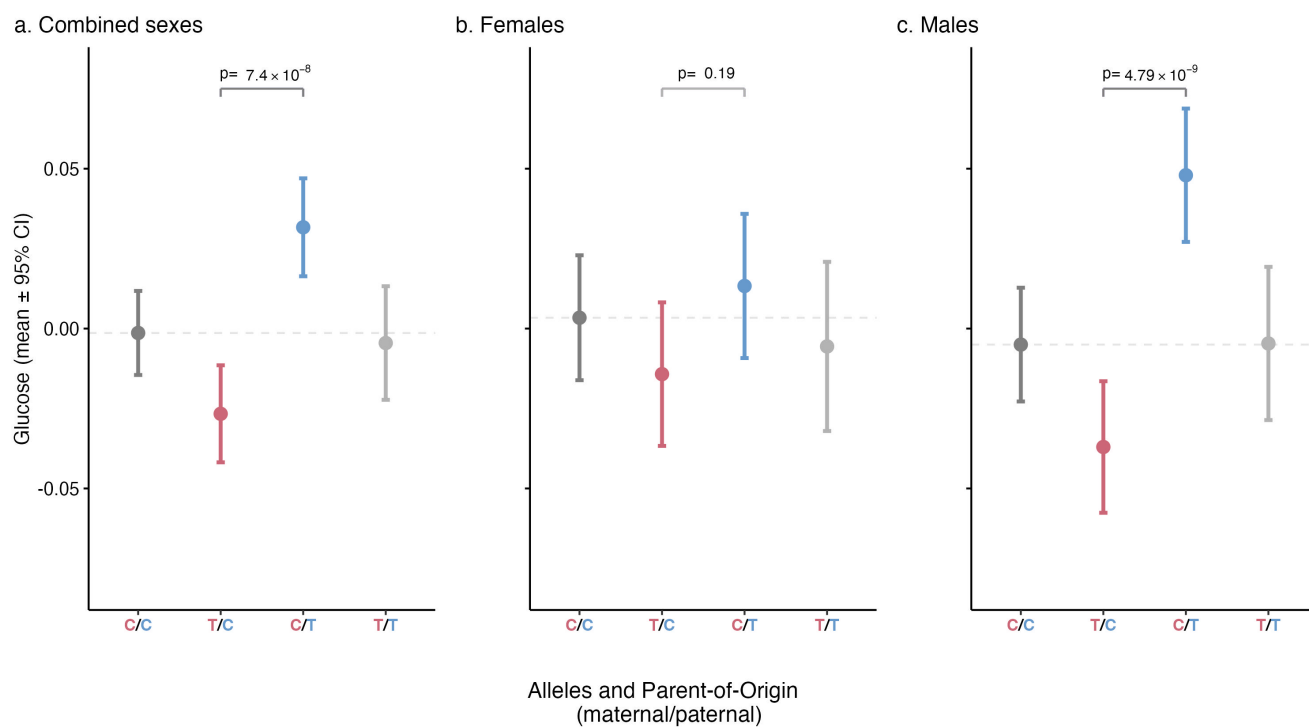

**Supplementary Fig. 20 | Sex-specific POE of rs4417225 on glucose levels.** Effects of genotypes and PofO of alleles (x-axis) on glucose level (y-axis) for (a) both sexes combined, (b) females only, and (c) males only. Red markers represent maternal heterozygotes, blue markers represent paternal heterozygotes, and dark and light grey represent homozygotes. The data points show the mean glucose levels, with error bars indicating the 95% confidence intervals. A grey dashed line represents the mean glucose level for individuals with the reference genotype (C/C). Significance values from the differential GWAS tests are annotated within each panel.

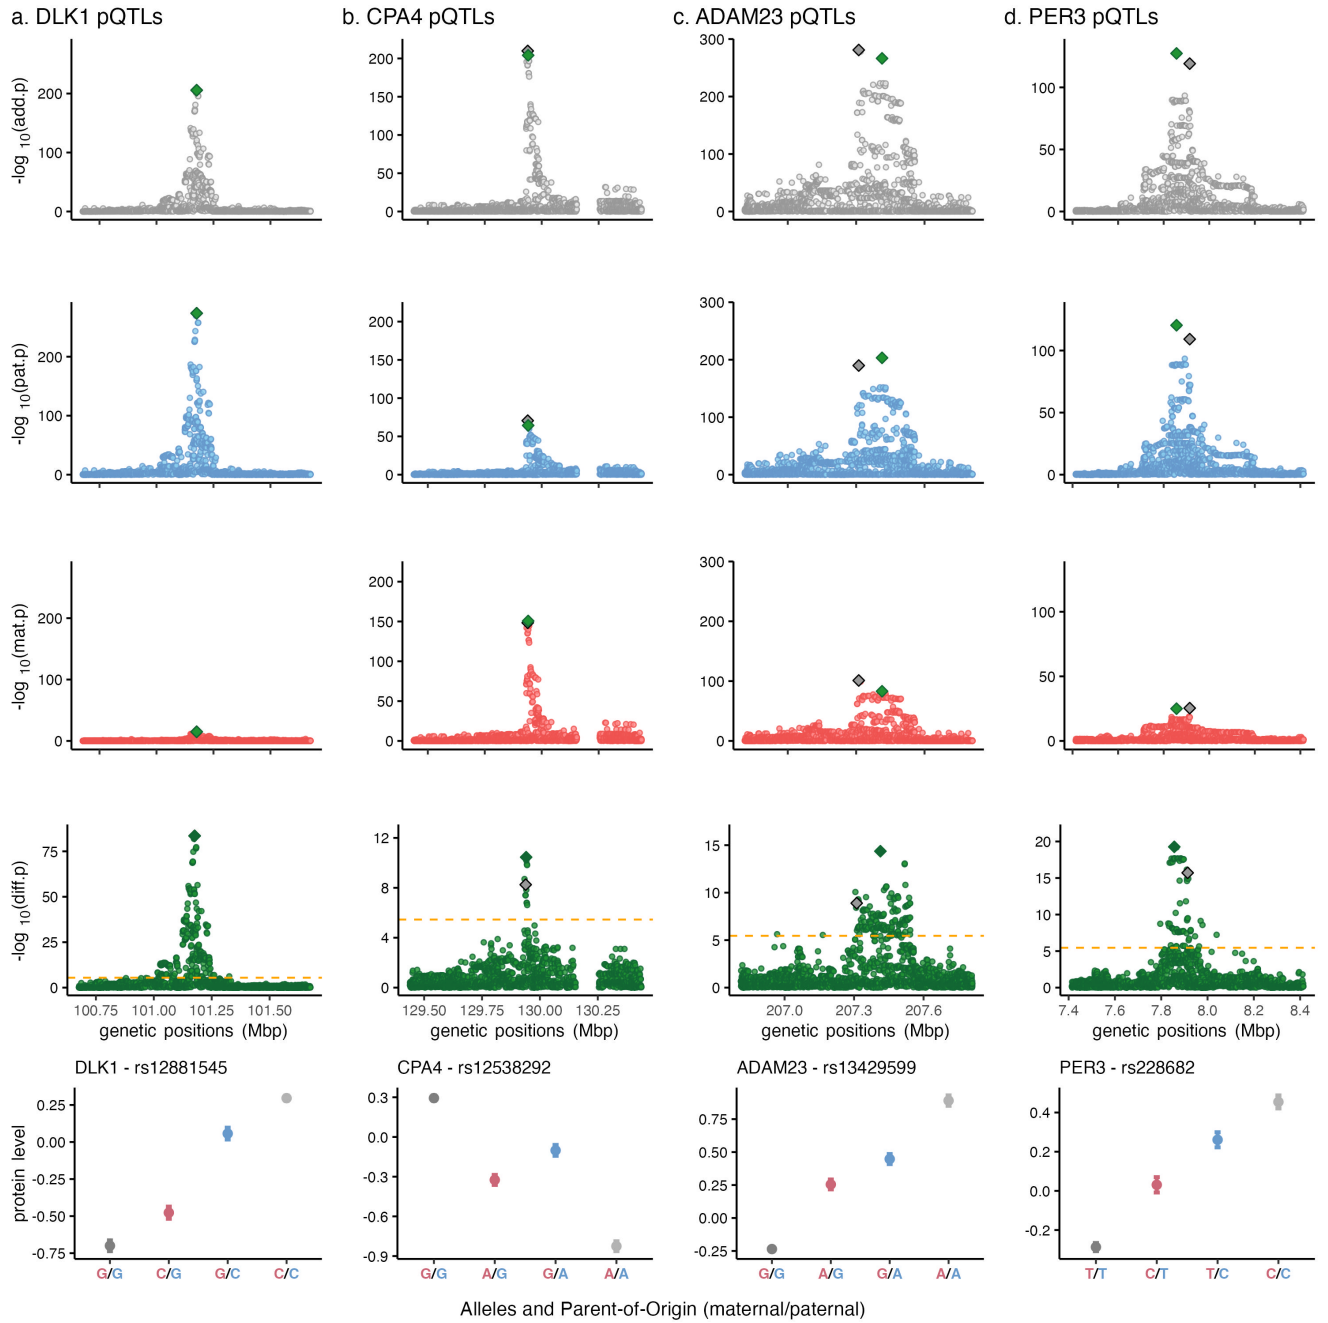

**Supplementary Fig. 21 | Significant Parent-of-Origin pQTLs.** Association strength ( $-\log_{10}(p - \text{value})$ , y-axis) against the genomic position (x-axis) for additive (grey), paternal (blue), maternal (red) and differential (green) GWAS on (a) DLK1, (b) CPA4, (c) ADAM23 and (d) PER3. Diamonds show the primary additive association previously reported<sup>3</sup> (grey) and the primary POE-pQTL detected in this study (green). Orange dashed line indicate the significance threshold ( $P_D < 0.05/14285 = 3.5 \times 10^{-6}$ ). **Bottom panel** show the effects of alleles and PofO on normalized protein levels.

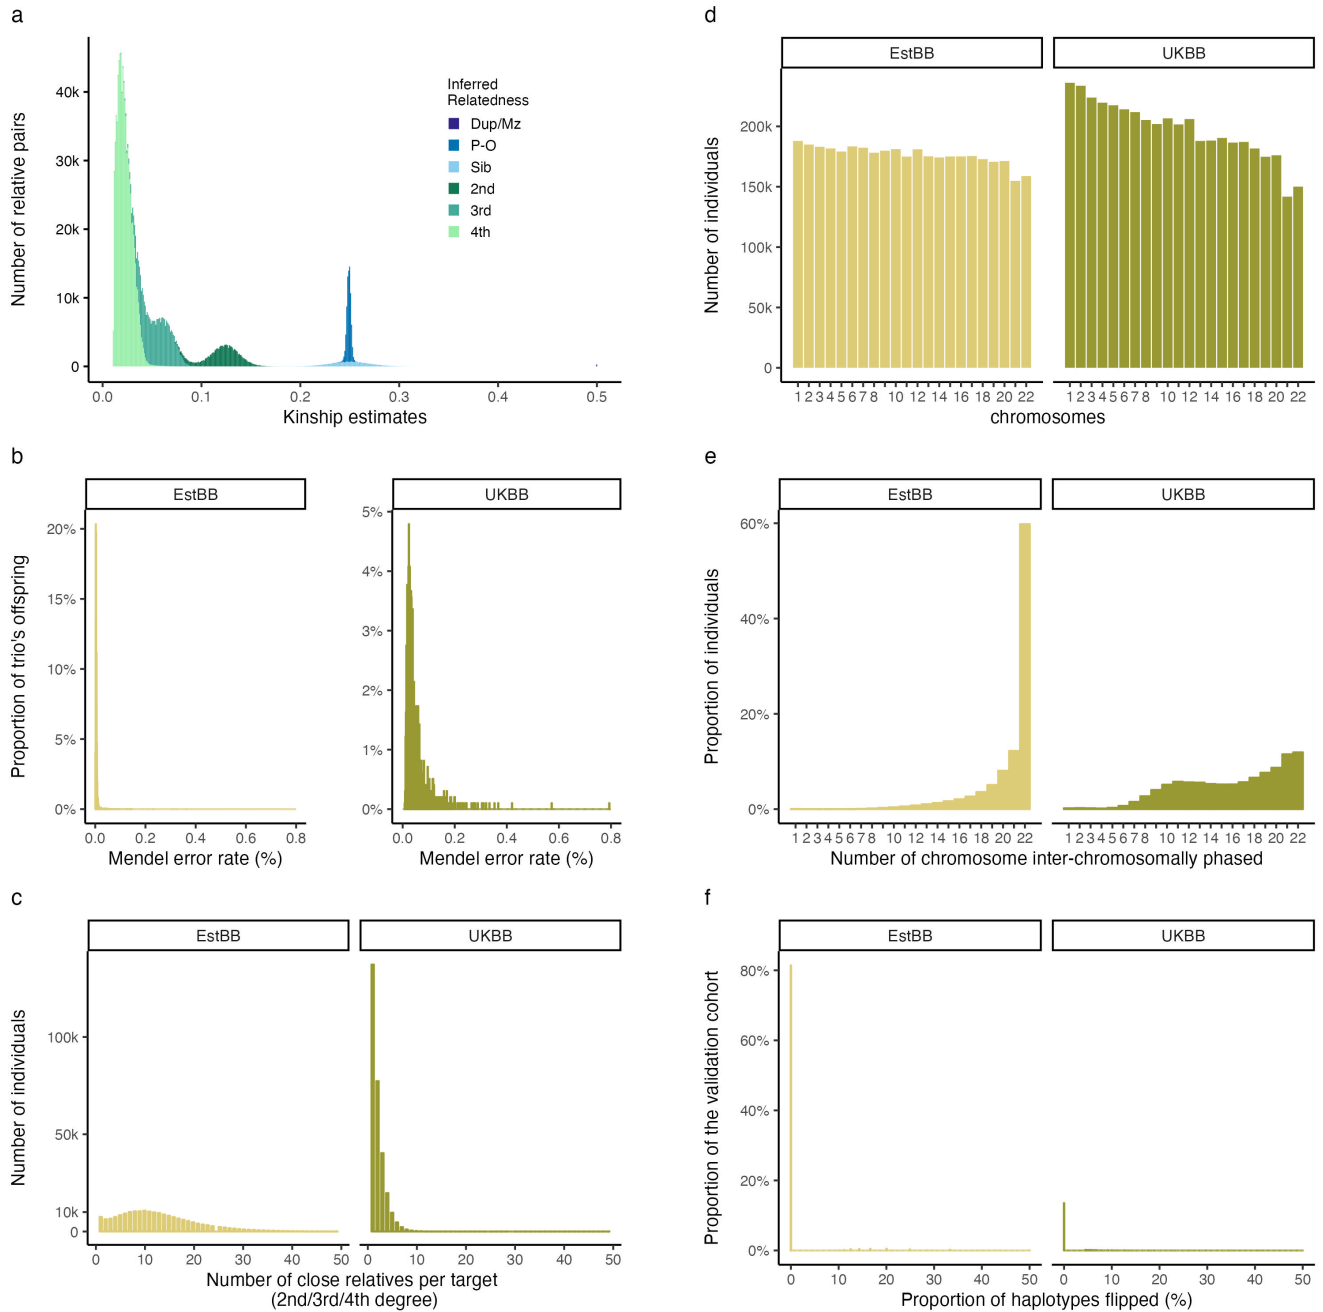

**Supplementary Fig. 22 | Overview of relatedness metrics and inter-chromosomal phasing in the Estonian Biobank (EstBB), with comparisons to the UK Biobank (UKBB).** **a**) Distribution of inferred relatedness across the EstBB cohort. Dup/MZ=monozygotic twins; P-O=parent-offspring; Sib=sibling; 2nd=2nd degree relative pairs; 3rd=3rd degree relative pairs; 4th=4th degree relative pairs. Relatedness was inferred using the KING software v2.2.7<sup>4</sup>. **b**) Distribution of Mendel error in trio's offspring for both the EstBB and UKBB cohorts. **c**) Distribution of the number of close relative per individual. **d**) Distribution of the number of individuals (y-axis) with a given chromosome (x-axis) successfully included in the inter-chromosomal phasing. **e**) Distribution of the number of individuals with N chromosomes (x-axis) successfully included in the inter-chromosomal phasing. **f**) Distribution of inter-chromosomal phasing error rate in the validation cohorts, calculated by comparing phasing results from surrogate parents to those obtained using parental genomes as the ground truth.

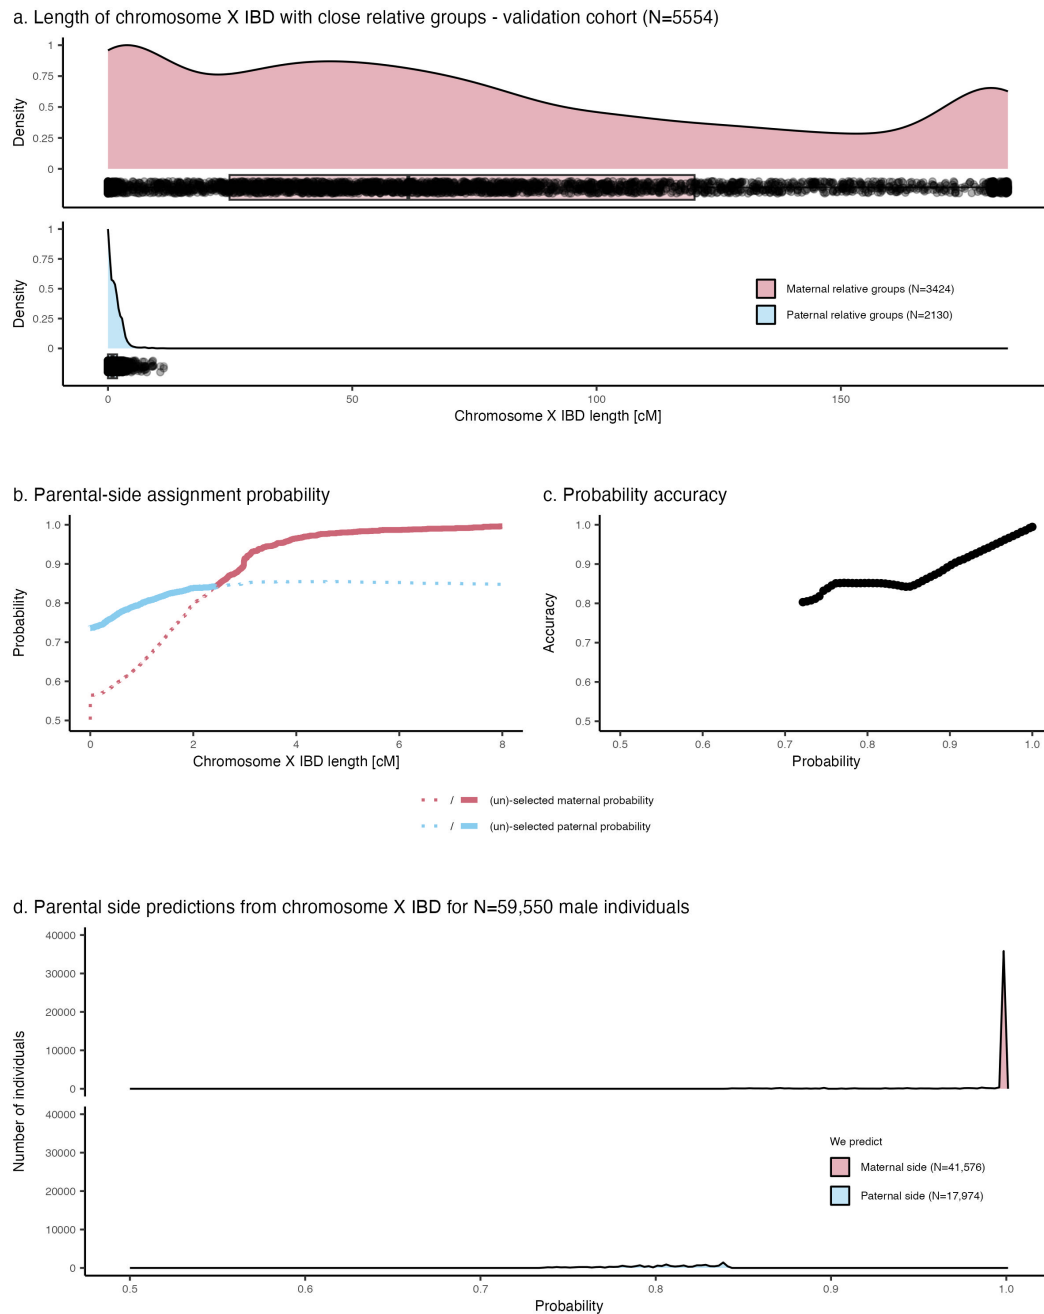

**Supplementary Fig. 23 | Parental side assignment from chromosome X IBD analysis in male individuals in the Estonian Biobank.** **a)** Density distribution of chromosome X IBD segment length in centimorgan (cM) between targets and surrogate father (blue) and targets and surrogate mother (red) across the validation cohort's male individuals. Boxes indicate the interquartile range (IQR), with the bottom and top of the box representing the 25th (Q1) and 75th (Q3) percentiles, respectively. The horizontal line within the box represents the median (50th percentile). Whiskers extend to the smallest and largest values within  $Q1 - 1.5 \times IQR$  and  $Q3 + 1.5 \times IQR$ . Each point represent a target-relative pair. **b)** Parental side probabilities depending on chromosome X IBD segment length derived from the validation cohort. Selected and unselected maternal (red) and paternal (blue) probabilities for a given x-axis value are indicated by solid and dotted lines, respectively. **c)** Accuracy of parental side predictions (y-axis) as a function of the parental side probability (x-axis). **d)** Distribution of maternal (red) and paternal (blue) side assignment probabilities derived chromosome X IBD across 59,550 Estonian Biobank male individuals.

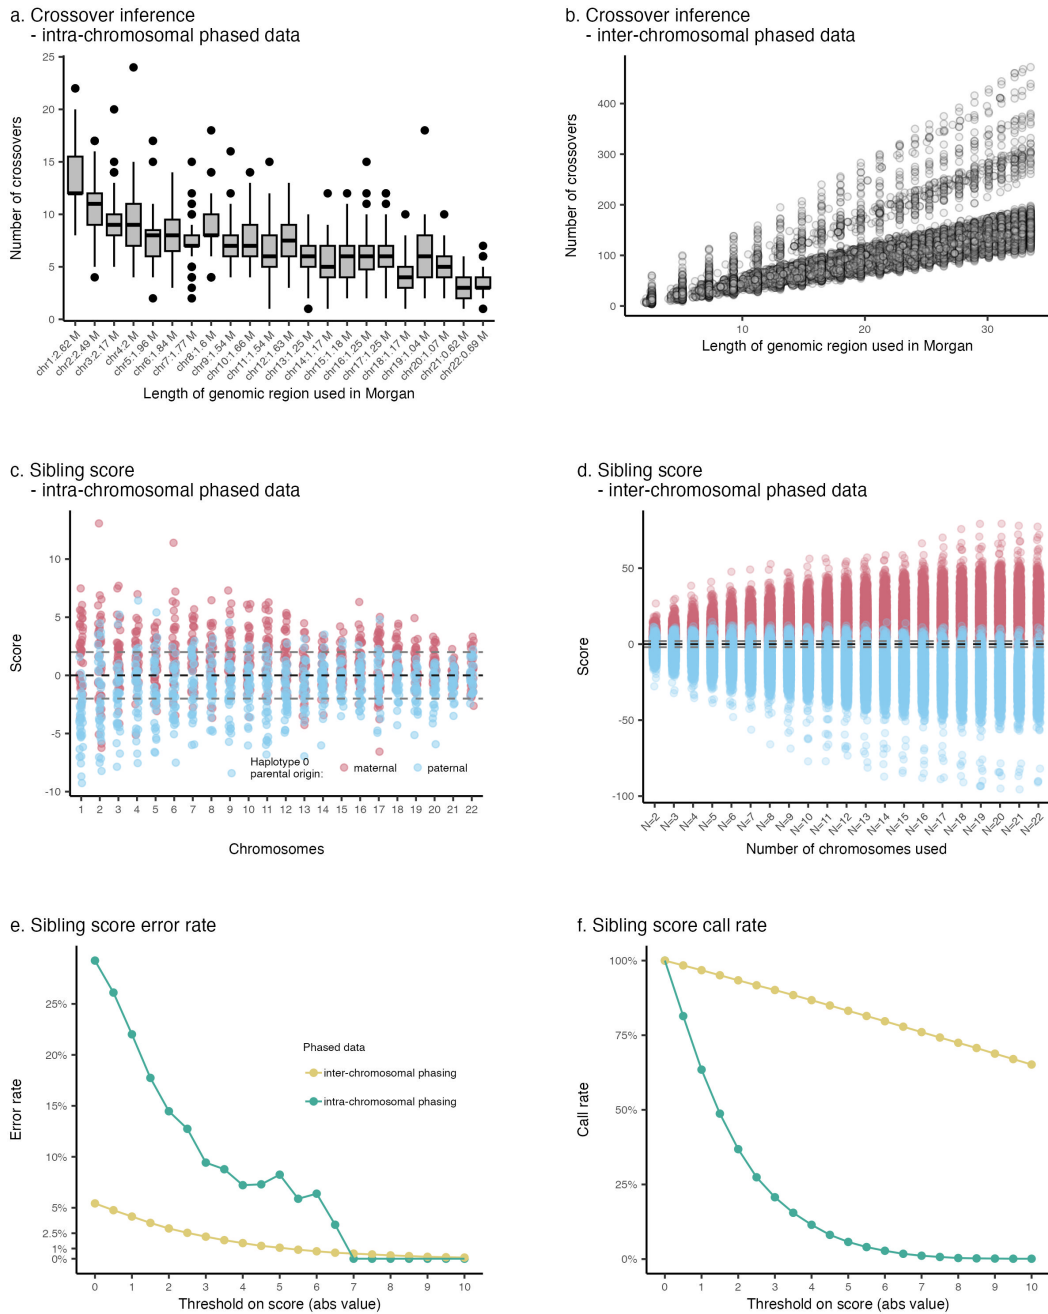

**Supplementary Fig. 24 | Evaluation of sibling scores from intra- and inter-chromosomal phasing in the Estonian Biobank validation cohort.** **a)** Distribution of the number of inferred crossovers (y-axis) per chromosome (x-axis) derived from intra-chromosomally phased data. **b)** Distribution of the number of inferred crossovers (y-axis) relative to the genomic length used (in Morgans, x-axis) derived from inter-chromosomally phased data. **c)** Distribution of sibling scores (y-axis) per chromosome (x-axis) using intra-chromosomally phased data. Maternal and paternal haplotypes are color-coded in red and blue, respectively. **d)** Distribution of sibling scores (y-axis) relative to the number of chromosomes included in inter-chromosomally phased data (x-axis). **e)** Error rates (y-axis) of sibling scores for varying score thresholds (absolute values, x-axis). **f)** Call rates (y-axis) of sibling scores for varying score thresholds (absolute values, x-axis), showing the proportion of individuals meeting the threshold criteria.

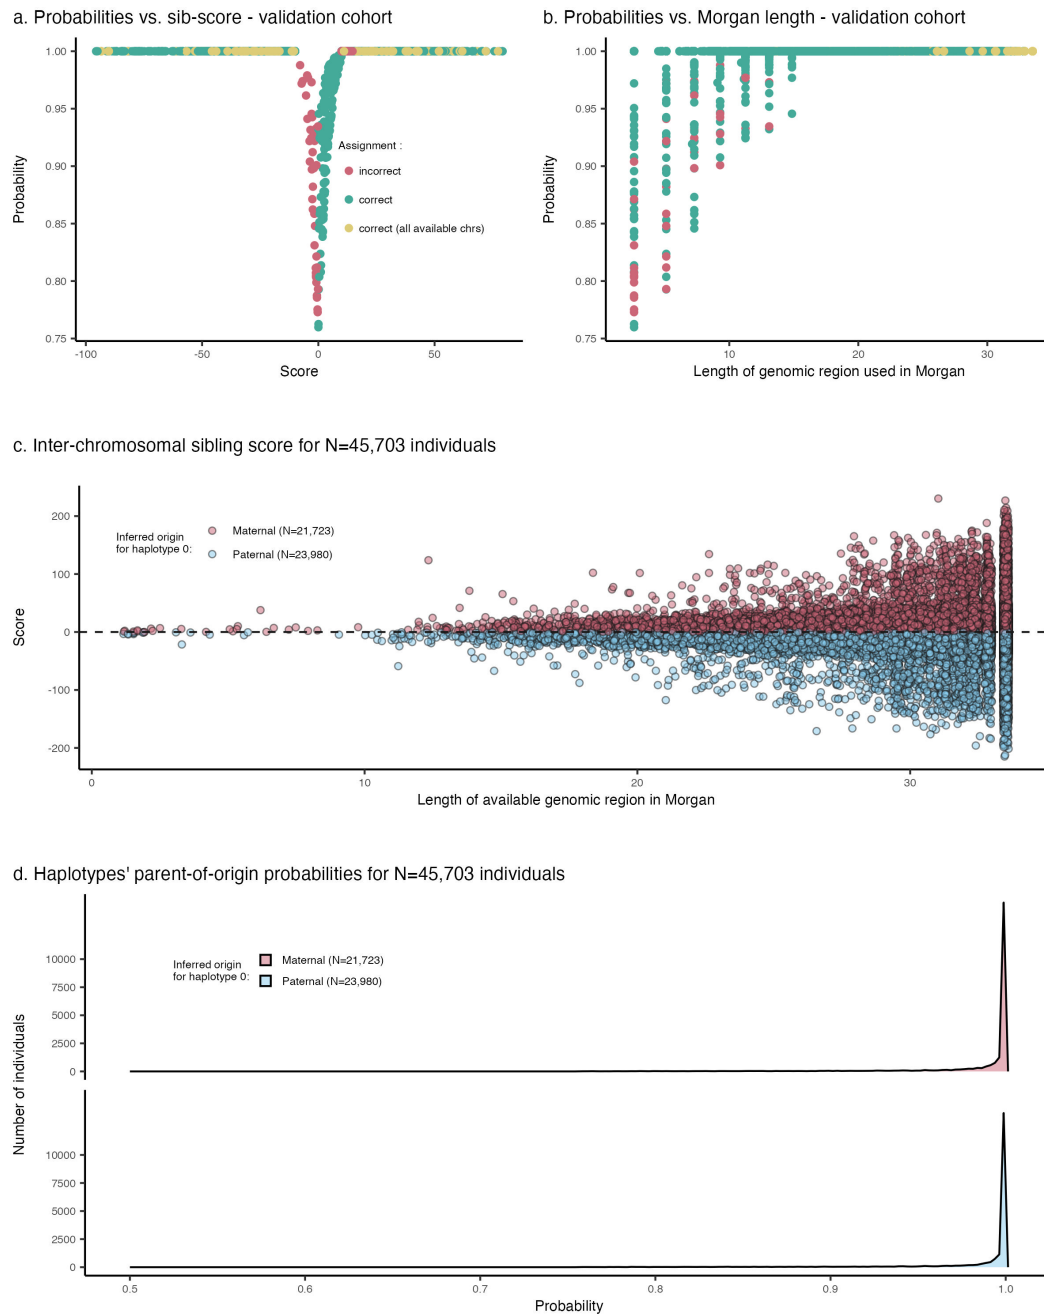

**Supplementary Fig. 25 | Validation and derivation of parent-of-origin probabilities using sibling scores from inter-chromosomal phased data in the Estonian Biobank.** **a)** PofO probabilities (y-axis) as a function of sibling scores (x-axis) in the validation cohort. Each dot represents a specific configuration (an individual with a given number of chromosomes used). We varied the number of chromosome used per individual to assess the accuracy of different configurations. Red dots indicate incorrect parental assignments, green dots indicate correct assignments, and yellow dots denote correct assignments using the maximum available chromosomes ( $N_{max}$ , corresponds to the full set of inter-chromosomally phased chromosome for a given individual). No errors were observed when  $N_{max}$  chromosomes were used. **b)** PofO probabilities (y-axis) plotted against the total available genomic length in Morgans (x-axis) for sibling score calculation in the validation cohort. Each configuration is represented as a dot (color-coded as in panel a). Increasing genomic length results in higher assignment accuracy, with perfect accuracy achieved at  $N_{max}$  (yellow dots). **c)** Sibling scores (y-axis) derived for N=45,703 individuals across available genomic lengths (x-axis). **d)** Distribution of PofO probabilities for 45,703 Estonian Biobank individuals.



a. Probability distribution for N=113,921 EstBB individuals

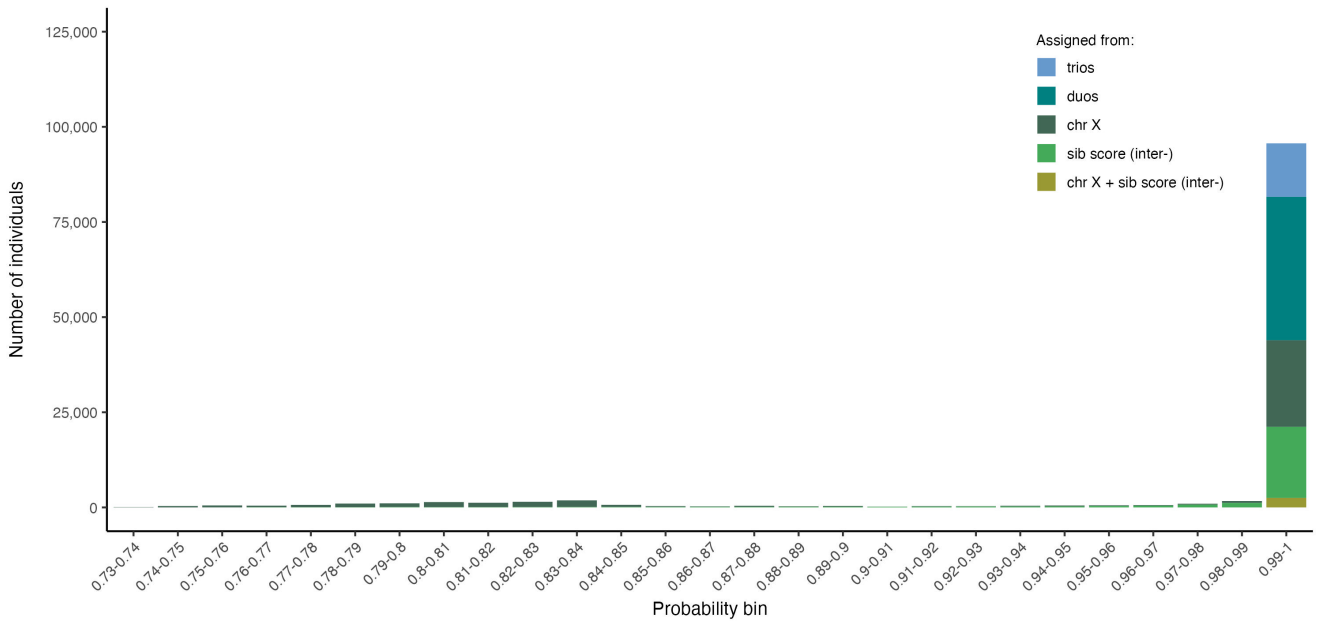

b. Parent-of-Origin error rates distribution

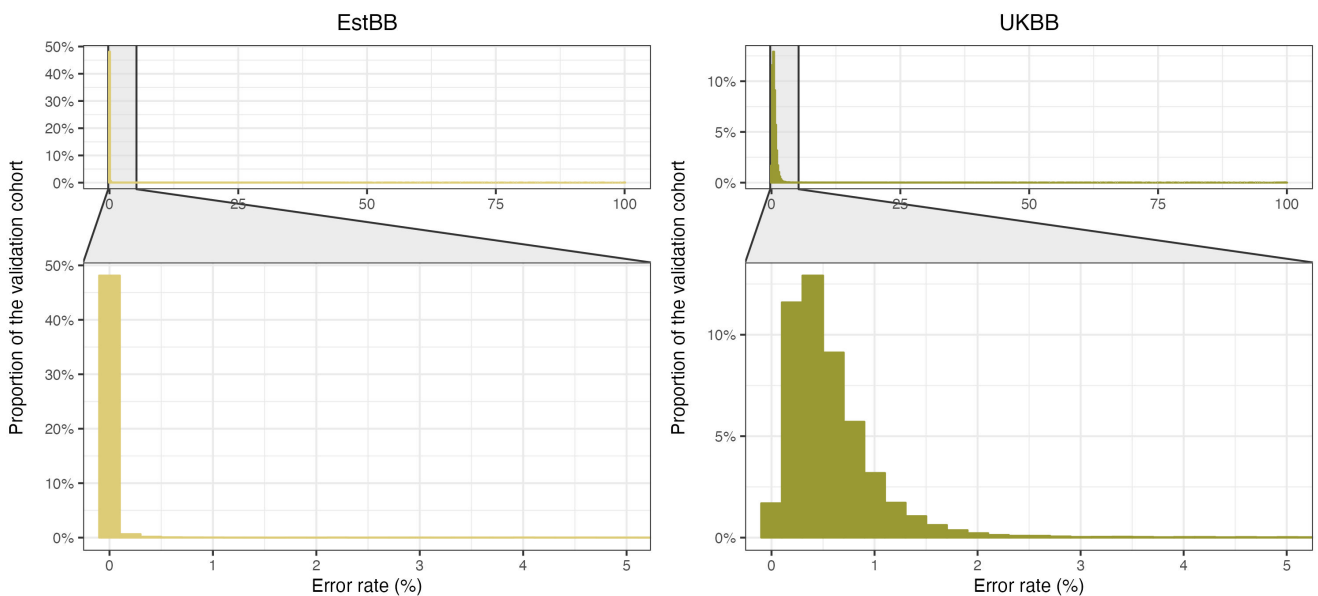

**Supplementary Fig. 26 | Parent-of-origin probability distribution and error rates in the Estonian Biobank.** **a)** Distribution of PofO probabilities for N=113,921 individuals in the Estonian Biobank, color-coded by the source of inference (e.g., chromosome X data, sibling score from inter-chromosomal phased data, duos, and trios). Most individuals exhibit high PofO probabilities, reflecting the accuracy of the approach. **b)** Comparison of PofO error rate distributions between the Estonian Biobank (EstBB) and UK Biobank (UKBB) validation cohorts. The EstBB shows consistently lower error rates, likely attributed to the higher number of close relatives per individual, which enhances IBD detection and improves inter-chromosomal phasing accuracy. Zoomed panels show the error rates below 5%, highlighting the robustness of PofO inference in both biobanks.

## Supplementary Tables

| TRAIT                          | N            | N males      | N females    |
|--------------------------------|--------------|--------------|--------------|
| Telomere length                | 109355       | 58552        | 50803        |
| Sodium in urine                | 109372       | 58565        | 50807        |
| Creatinine                     | 109379       | 58568        | 50811        |
| Microalbumin in urine          | 109379       | 58568        | 50811        |
| Vitamin D                      | 109385       | 58572        | 50813        |
| Urate                          | 109385       | 58572        | 50813        |
| Triglycerides                  | 109385       | 58572        | 50813        |
| Total protein                  | 109385       | 58572        | 50813        |
| Testosterone                   | 109385       | 58572        | 50813        |
| Total bilirubin                | 109385       | 58572        | 50813        |
| SHBG                           | 109385       | 58572        | 50813        |
| Rheumatoid factor              | 109385       | 58572        | 50813        |
| Phosphate                      | 109385       | 58572        | 50813        |
| Oestradiol                     | 109385       | 58572        | 50813        |
| Lipoprotein A                  | 109385       | 58572        | 50813        |
| LDL direct                     | 109385       | 58572        | 50813        |
| IGF-1                          | 109385       | 58572        | 50813        |
| HDL cholesterol                | 109385       | 58572        | 50813        |
| Glycated haemoglobin           | 109385       | 58572        | 50813        |
| Glucose                        | 109385       | 58572        | 50813        |
| Gamma glutamyltransferase      | 109385       | 58572        | 50813        |
| Cystatin C                     | 109385       | 58572        | 50813        |
| C-reactive protein             | 109385       | 58572        | 50813        |
| Creatinine                     | 109385       | 58572        | 50813        |
| Cholesterol                    | 109385       | 58572        | 50813        |
| Calcium                        | 109385       | 58572        | 50813        |
| Urea                           | 109385       | 58572        | 50813        |
| Direct bilirubin               | 109385       | 58572        | 50813        |
| Aspartate aminotransferase     | 109385       | 58572        | 50813        |
| Apolipoprotein B               | 109385       | 58572        | 50813        |
| Apolipoprotein A               | 109385       | 58572        | 50813        |
| Alanine aminotransferase       | 109385       | 58572        | 50813        |
| Alkaline phosphatase           | 109385       | 58572        | 50813        |
| Albumin                        | 109385       | 58572        | 50813        |
| Reticulocyte count             | 109385       | 58572        | 50813        |
| Nucleated red blood cell count | 109385       | 58572        | 50813        |
| Basophil count                 | 109385       | 58572        | 50813        |
| Eosinophil count               | 109385       | 58572        | 50813        |
| Neutrophil count               | 109385       | 58572        | 50813        |
| Monocyte count                 | 109385       | 58572        | 50813        |
| Lymphocyte count               | 109385       | 58572        | 50813        |
| Platelet count                 | 109385       | 58572        | 50813        |
| Red blood cell                 | 109385       | 58572        | 50813        |
| White blood cell               | 109385       | 58572        | 50813        |
| Standing height                | 109385       | 58572        | 50813        |
| Hip circumference              | 109385       | 58572        | 50813        |
| Waist circumference            | 109385       | 58572        | 50813        |
| Trunk fat-free mass            | 109385       | 58572        | 50813        |
| Trunk fat percentage           | 109385       | 58572        | 50813        |
| Arm fat-free mass              | 109385       | 58572        | 50813        |
| Arm fat percentage             | 109385       | 58572        | 50813        |
| Leg fat-free mass              | 109385       | 58572        | 50813        |
| Leg fat percentage             | 109385       | 58572        | 50813        |
| Basal metabolic rate           | 109385       | 58572        | 50813        |
| Whole body water mass          | 109385       | 58572        | 50813        |
| Body fat percentage            | 109385       | 58572        | 50813        |
| Body mass index                | 109385       | 58572        | 50813        |
| Birth weight                   | 109385       | 58572        | 50813        |
| Type 2 diabetes                | 9189 (99007) | 6265 (51513) | 2925 (47495) |

**Supplementary Table 1 | UK Biobank traits selected for this study.**

TRAIT: phenotype name; N: number of individuals (selected as (i) self-reported as white British, confirmed by PCA, according to UK Biobank field 22006; (ii) having a PofO probability > 0.99, as defined for the differential GWAS<sup>5</sup>). For type 2 diabetes, we indicated cases and controls. TS ratio: Relative leucocyte telomere length; SHBG: Sex Hormone-Binding Globulin.

|                                        |                 |              |                  | Published studies |          |           |          |          | Current study |          |          |          |          |
|----------------------------------------|-----------------|--------------|------------------|-------------------|----------|-----------|----------|----------|---------------|----------|----------|----------|----------|
|                                        | TRAIT           | RSID         | ID               | BETA PAT          | P PAT    | BETA MAT  | P MAT    | P DIFF   | BETA PAT      | P PAT    | BETA MAT | P MAT    | P DIFF   |
| Kim et al.,<br>HGG Adv 2021            | HDL-C           | rs12154627*  | 7_130422934_T_C  | 0.0300            | 6.40E-02 | 0.1300    | 2.10E-16 | 3.10E-06 | 0.0139        | 2.76E-02 | 0.0463   | 1.93E-13 | 6.20E-04 |
|                                        | triglyceride    | rs12154627*  | 7_130422934_T_C  | -0.0100           | 5.60E-01 | -0.1000   | 1.40E-09 | 1.30E-04 | -0.0151       | 2.69E-02 | -0.0465  | 8.94E-12 | 1.00E-03 |
|                                        | platelets       | rs10146962*  | 14_101170540_T_C | 0.0400            | 6.30E-02 | -0.1000   | 2.30E-11 | 7.80E-10 | -0.0180       | 9.17E-03 | -0.0964  | 3.73E-44 | 9.22E-16 |
| Zoledziewska et al.,<br>Nat Genet 2015 | Height          | rs143840904* | 11_2813322_C_T   | 0.0021            | 9.65E-01 | -0.2740   | 3.98E-08 | 7.55E-05 | -0.0226       | 1.37E-01 | -0.1831  | 9.13E-32 | 5.21E-13 |
|                                        | Height          | rs2075870*   | 11_2790019_G_A   | -0.0172           | 7.93E-01 | -0.2730   | 6.97E-08 | 2.00E-04 | -0.0246       | 8.31E-02 | -0.1439  | 3.00E-23 | 3.89E-09 |
|                                        | Height          | rs149658560* | 11_2767262_G_A   | -0.0121           | 8.18E-01 | -0.2970   | 2.93E-07 | 3.00E-04 | -0.0066       | 6.13E-01 | -0.0917  | 6.47E-12 | 7.09E-06 |
| Granot-Hershkovitz et al., EJHG 2020   | Height          | rs1042136    | 6_33048628_A_C   | -0.0230           | 1.55E-08 | 0.0050    | 4.21E-01 | 1.39E-04 | -0.0160       | 3.54E-03 | -0.0062  | 2.57E-01 | 1.90E-01 |
| Benonisdottir et al.,<br>Nat Comm 2016 | Height          | rs147239461* | 11_1986402_G_T   | -0.1200           | 5.90E-13 | 0.0560    | 9.40E-04 | 1.20E-13 | -0.0484       | 2.80E-05 | 0.0395   | 4.92E-04 | 4.89E-08 |
|                                        | Height          | rs7482510    | 11_2190591_C_G   | -0.0650           | 5.10E-11 | 0.0180    | 7.60E-02 | 4.70E-09 | -0.0189       | 2.71E-04 | 0.0002   | 9.71E-01 | 4.15E-03 |
|                                        | Height          | rs143840904* | 11_2813322_C_T   | 0.0570            | 4.20E-02 | -0.2600   | 2.00E-17 | 1.60E-14 | -0.0226       | 1.37E-01 | -0.1831  | 9.13E-32 | 5.21E-13 |
|                                        | Height          | rs41286560*  | 14_101349454_G_T | -0.1200           | 2.20E-08 | 0.0670    | 1.70E-03 | 7.40E-10 | -0.0519       | 5.03E-05 | 0.0168   | 1.87E-01 | 1.46E-04 |
| Kong et al., Nature 2009               | T2D             | rs2334499*   | 11_1696849_C_T   | 1.35 (OR)         | 4.70E-10 | 0.86 (OR) | 2.00E-03 | 4.10E-11 | 0.1391        | 2.19E-07 | -0.0737  | 6.05E-03 | 2.16E-08 |
| Hofmeister et al.,<br>Nat Comm 2022    | telomere length | rs2735940*   | 5_1296486_A_G    | 0.0088            | 4.60E-01 | -0.1215   | 2.10E-19 | 4.30E-13 | 0.014         | 4.59E-02 | -0.100   | 3.12E-49 | 2.84E-32 |
|                                        | platelets       | rs59228823*  | 14_101185187_G_C | -0.0110           | 5.80E-01 | -0.1230   | 6.80E-16 | 2.30E-08 | -0.015        | 4.68E-02 | -0.104   | 2.14E-42 | 2.42E-16 |
| Juliusdottir et al.,<br>Nat Genet 2021 | birth weight    | rs9855896    | 3_14287150_A_G   | 0.039             | 4.90E-05 | -0.017    | 1.30E-01 | 1.65E-04 | -0.009        | 4.29E-01 | 0.019    | 8.74E-02 | 7.59E-02 |
|                                        | birth weight    | rs6575803    | 14_101257755_C_T | 0.094             | 8.30E-17 | 0.009     | 5.20E-01 | 6.00E-07 | -0.049        | 2.03E-03 | -0.014   | 3.75E-01 | 1.48E-01 |
|                                        | birth weight    | rs2296528    | 20_57274151_G_C  | 0.037             | 3.80E-06 | -0.012    | 2.10E-01 | 4.72E-05 | 0.032         | 1.64E-03 | 0.022    | 3.45E-02 | 4.68E-01 |
|                                        | birth weight    | rs76094073   | 6_109288036_C_G  | -0.007            | 5.20E-01 | 0.06      | 1.60E-05 | 2.80E-04 | 0.042         | 2.89E-03 | 0.039    | 5.84E-03 | 8.63E-01 |
|                                        | birth weight    | rs2529415    | 7_50736662_C_T   | -0.004            | 6.70E-01 | 0.039     | 1.50E-04 | 7.86E-04 | -0.001        | 9.25E-01 | -0.017   | 8.40E-02 | 2.39E-01 |
|                                        | birth weight    | rs2901307    | 10_124128443_C_T | 0.001             | 8.50E-01 | 0.044     | 2.20E-06 | 7.03E-05 | 0.026         | 5.52E-03 | 0.031    | 7.07E-04 | 6.63E-01 |
|                                        | birth weight    | rs231848     | 11_2735557_A_G   | -0.003            | 7.00E-01 | 0.051     | 8.10E-08 | 9.70E-06 | 0.005         | 6.19E-01 | -0.019   | 4.41E-02 | 7.32E-02 |
|                                        | birth weight    | rs2928148    | 15_41401550_G_A  | 0.002             | 8.00E-01 | 0.045     | 1.30E-06 | 1.62E-04 | 0.016         | 8.77E-02 | 0.026    | 7.09E-03 | 4.88E-01 |

**Supplementary Table 2 | Replication of previously published Parent-of-origin effects.**

TRAIT: phenotype name; RSID: variant rs id; ID: chromosome\_position(hg19)\_reference allele\_alternative allele;  
 BETA and P denote effect sizes and P-values; PAT, MAT, and DIFF denote paternal, maternal and differential  
 tests; \*: associations replicated in our study.

| Chromosome | Region start | Region end | Genes overlapping region                                                  |
|------------|--------------|------------|---------------------------------------------------------------------------|
| chr1       | 68011644     | 69016459   | ARHI                                                                      |
| chr2       | 80015483     | 81031487   | LRRTM1                                                                    |
| chr4       | 89117065     | 90118980   | NAPIL5                                                                    |
| chr6       | 56682421     | 57691161   | PRIM2                                                                     |
| chr6       | 143761436    | 144885734  | PLAGL1,HYMAI                                                              |
| chr6       | 159890130    | 161376014  | IGF2R,SLC22A2,SLC22A3                                                     |
| chr7       | 50154712     | 51361157   | GRB10                                                                     |
| chr7       | 93714535     | 95425726   | SGCE,PEG10,PPP1R9A                                                        |
| chr7       | 96149701     | 97154142   | DLX5                                                                      |
| chr7       | 129432993    | 130918860  | CPA4,MEST,KLF14                                                           |
| chr8       | 949568       | 2156642    | DLGAP2                                                                    |
| chr8       | 140113081    | 141215299  | KCNK9                                                                     |
| chr11      | 1516405      | 3686539    | H19,IGF2,IGF2AS,INS,KCNQ1,KCNQ1DN,CDKN1C,SLC22A1LS,SLC22A1L,PHLDA2,OSBPL5 |
| chr11      | 5911654      | 7479277    | SMPD1,ZNF215                                                              |
| chr11      | 31909324     | 32957086   | WT1                                                                       |
| chr14      | 100693252    | 101827367  | DLK1,MEG3                                                                 |
| chr15      | 23310105     | 24432449   | MKRN3,MAGEL2,NDN                                                          |
| chr15      | 24700069     | 26608348   | SNURF,IPW,UBE3A,ATP10A                                                    |
| chr16      | 2986109      | 3993490    | ZNF597                                                                    |
| chr18      | 44054572     | 45056448   | TCEB3C                                                                    |
| chr19      | 56785919     | 57852075   | ZIM2,PEG3                                                                 |
| chr20      | 35649606     | 36652091   | NNAT                                                                      |
| chr20      | 41643052     | 42670534   | L3MBTL                                                                    |
| chr20      | 56914783     | 57986249   | NESP55,GNAS1                                                              |

### Supplementary Table 3 | Imprinted regions.

Imprinted regions extracted from Kong *et al.*<sup>6</sup> and lifted over to hg19.

| CHR | POS     | SNP ID      | A0 | A1 | A1FREQ | BETA PAT | SE PAT | P PAT    | BETA MAT | SE MAT | P MAT    | BETA DIFF | SE DIFF | P DIFF   | BETA ADD | SE ADD | P ADD    | TRAIT          |
|-----|---------|-------------|----|----|--------|----------|--------|----------|----------|--------|----------|-----------|---------|----------|----------|--------|----------|----------------|
| 11  | 1918083 | rs7105710   | T  | C  | 0.546  | 0.001    | 0.005  | 8.18E-01 | -0.013   | 0.005  | 8.00E-03 | 0.014     | 0.007   | 4.10E-02 | -0.006   | 0.003  | 8.70E-02 | Sitting height |
| 11  | 2040272 | rs77708343  | A  | G  | 0.039  | -0.055   | 0.012  | 8.51E-06 | 0.046    | 0.012  | 1.21E-04 | -0.101    | 0.017   | 4.17E-09 | -0.003   | 0.009  | 6.95E-01 | Sitting height |
| 11  | 2813322 | rs143840904 | C  | T  | 0.019  | -0.044   | 0.018  | 1.30E-02 | -0.131   | 0.018  | 6.61E-13 | 0.087     | 0.025   | 3.80E-04 | -0.086   | 0.013  | 1.06E-11 | Sitting height |

**Supplementary Table 4 | Replication of standing height association with sitting height.**

CHR: chromosome; POS: genetic position (hg19); SNP ID: variant rs id; A0: reference allele; A1: assessed allele; A1FREQ: A1 allele frequency. BETA, SE and P denote effect sizes, standard errors and P-values; PAT, MAT, DIFF and ADD denote paternal, maternal, differential and additive tests. TRAIT: phenotype name.

| CHR | POS       | SNP ID     | A0 | A1 | A1FREQ | BETA PAT | SE PAT | P PAT    | BETA MAT | SE MAT | P MAT    | BETA DIFF | SE DIFF | P DIFF   | BETA ADD | SE ADD | P ADD    | TRAIT          | Status | Locus            |
|-----|-----------|------------|----|----|--------|----------|--------|----------|----------|--------|----------|-----------|---------|----------|----------|--------|----------|----------------|--------|------------------|
| 2   | 54422548  | rs7562908  | A  | G  | 0.026  | 0.148    | 0.021  | 1.06E-12 | 0.043    | 0.021  | 3.86E-02 | -0.104    | 0.029   | 4.17E-04 | -0.099   | 0.015  | 2.80E-11 | TS ratio       | novel  | ACYP2            |
| 3   | 46058335  | rs6809223  | T  | C  | 0.734  | -0.049   | 0.007  | 1.62E-11 | -0.015   | 0.007  | 4.20E-02 | -0.034    | 0.010   | 8.80E-04 | -0.032   | 0.005  | 5.24E-10 | Basophil count | novel  | CCR1, CCR3, XCR1 |
| 3   | 156795468 | rs13322435 | A  | G  | 0.403  | -0.072   | 0.009  | 1.05E-14 | -0.038   | 0.009  | 3.15E-05 | -0.033    | 0.013   | 1.12E-02 | -0.055   | 0.007  | 4.24E-17 | Birth weight   | novel  | TIPARP           |
| 5   | 72399063  | rs10223082 | T  | C  | 0.667  | -0.052   | 0.008  | 9.54E-12 | -0.014   | 0.008  | 6.50E-02 | -0.037    | 0.011   | 5.12E-04 | -0.033   | 0.005  | 9.51E-10 | Calcium        | novel  | FCHO2            |
| 7   | 73026378  | rs17145750 | C  | T  | 0.162  | 0.015    | 0.009  | 9.68E-02 | 0.063    | 0.009  | 9.07E-13 | -0.048    | 0.013   | 1.18E-04 | 0.039    | 0.006  | 4.60E-10 | IGF-1          | novel  | MLXIPL           |
| 11  | 2157793   | rs3213217  | A  | T  | 0.236  | 0.096    | 0.008  | 1.44E-34 | 0.058    | 0.008  | 2.01E-13 | 0.038     | 0.011   | 5.72E-04 | 0.077    | 0.006  | 7.74E-44 | IGF-1          | novel  | IGF2             |

**Supplementary Table 5 | Parent-of-origin effect within additively associated regions, per phenotype.**

CHR: chromosome; POS: genetic position (hg19); SNP ID: variant rs id; A0: reference allele; A1: assessed allele; A1FREQ: A1 allele frequency. BETA, SE and P denote effect sizes, standard errors and P-values; PAT, MAT, DIFF and ADD denote paternal, maternal, differential and additive tests. TRAIT: phenotype name.

|   | CHR | POS       | SNP ID            | A0 | A1 | A1FREQ | BETA PAT | SE PAT | P PAT    | BETA MAT | SE MAT | P MAT    | BETA DIFF | SE DIFF | P DIFF   | BETA ADD | SE ADD | P ADD    | PHECODE | TRAIT                 |
|---|-----|-----------|-------------------|----|----|--------|----------|--------|----------|----------|--------|----------|-----------|---------|----------|----------|--------|----------|---------|-----------------------|
| a | 5   | 1296486   | rs2735940         | A  | G  | 0.493  | 0.014    | 0.007  | 4.59E-02 | -0.100   | 0.007  | 3.12E-49 | 0.113     | 0.010   | 2.84E-32 | -0.043   | 0.005  | 1.71E-19 | 22191   | TS ratio              |
|   | 11  | 1702929   | <b>rs10838787</b> | G  | A  | 0.425  | 0.050    | 0.007  | 2.34E-14 | -0.028   | 0.007  | 1.80E-05 | 0.078     | 0.009   | 2.77E-17 | 0.011    | 0.005  | 1.76E-02 | 30750   | Glycated haemoglobin  |
|   | 11  | 1998031   | <b>rs170102</b>   | G  | A  | 0.346  | -0.041   | 0.006  | 5.96E-11 | 0.026    | 0.006  | 3.19E-05 | -0.067    | 0.009   | 5.98E-14 | -0.007   | 0.004  | 9.47E-02 | 30720   | Cystatin C            |
|   | 11  | 2003944   | 2003944           | T  | G  | 0.656  | 0.030    | 0.006  | 2.53E-07 | -0.024   | 0.006  | 2.68E-05 | 0.054     | 0.008   | 4.94E-11 | 0.003    | 0.004  | 5.04E-01 | 30700   | Creatinine            |
|   | 11  | 2813322   | rs143840904       | C  | T  | 0.019  | -0.023   | 0.015  | 1.37E-01 | -0.183   | 0.016  | 9.13E-32 | 0.152     | 0.021   | 5.21E-13 | -0.100   | 0.011  | 2.56E-20 | 50      | Standing height       |
| b | 14  | 101185187 | rs59228823        | G  | C  | 0.245  | -0.010   | 0.008  | 2.04E-01 | -0.092   | 0.008  | 3.87E-34 | 0.082     | 0.011   | 1.92E-14 | -0.051   | 0.005  | 2.36E-21 | 30080   | Platelet count        |
|   | 7   | 130016470 | <b>rs62471721</b> | G  | A  | 0.351  | -0.023   | 0.007  | 9.70E-04 | 0.033    | 0.007  | 1.57E-06 | -0.057    | 0.010   | 6.51E-09 | 0.005    | 0.005  | 2.85E-01 | 30870   | Triglycerides         |
|   | 11  | 1702929   | <b>rs10838787</b> | G  | A  | 0.425  | 0.136    | 0.027  | 3.88E-07 | -0.091   | 0.027  | 7.55E-04 | 0.228     | 0.038   | 1.87E-09 | 0.023    | 0.019  | 2.26E-01 | 130708  | Type 2 diabetes       |
|   | 11  | 2040272   | <b>rs77708343</b> | A  | G  | 0.040  | -0.052   | 0.011  | 1.28E-06 | 0.033    | 0.011  | 2.06E-03 | -0.085    | 0.015   | 1.80E-08 | -0.009   | 0.008  | 2.29E-01 | 23113   | Leg fat-free mass     |
|   | 20  | 57216538  | <b>rs80116540</b> | A  | G  | 0.075  | 0.035    | 0.010  | 4.38E-04 | -0.043   | 0.010  | 2.04E-05 | 0.078     | 0.014   | 3.39E-08 | -0.004   | 0.007  | 6.09E-01 | 23119   | Arm fat percentage    |
|   | 1   | 40593883  | rs145976519       | A  | C  | 0.022  | 0.096    | 0.031  | 2.00E-03 | -0.155   | 0.031  | 5.96E-07 | 0.251     | 0.043   | 3.96E-09 | -0.030   | 0.022  | 1.78E-01 | 20022   | Birth weight          |
|   | 1   | 81185936  | rs2152857         | A  | G  | 0.024  | -0.074   | 0.018  | 3.08E-05 | 0.066    | 0.018  | 1.96E-04 | 0.143     | 0.025   | 1.58E-08 | 0.007    | 0.014  | 6.03E-01 | 30840   | Total bilirubin       |
|   | 2   | 863453    | rs73161490        | T  | G  | 0.162  | -0.035   | 0.009  | 4.70E-05 | 0.031    | 0.009  | 2.40E-04 | -0.066    | 0.012   | 4.89E-08 | -0.002   | 0.006  | 7.99E-01 | 30770   | IGF-1                 |
|   | 3   | 108030034 | rs17241163        | A  | G  | 0.091  | 0.087    | 0.026  | 6.55E-04 | -0.116   | 0.026  | 7.34E-06 | 0.202     | 0.036   | 2.08E-08 | -0.014   | 0.018  | 4.58E-01 | 30800   | Oestradiol            |
|   | 5   | 127663392 | 5 127663392 G A   | G  | A  | 0.139  | 0.024    | 0.010  | 1.28E-02 | -0.052   | 0.010  | 1.33E-07 | 0.076     | 0.014   | 4.65E-08 | -0.014   | 0.007  | 4.82E-02 | 30140   | Neutrophill count     |
|   | 11  | 114407458 | rs138298109       | A  | C  | 0.024  | -0.082   | 0.023  | 3.87E-04 | 0.091    | 0.023  | 7.28E-05 | -0.169    | 0.031   | 4.03E-08 | 0.005    | 0.016  | 7.52E-01 | 30510   | Creatinine            |
|   | 14  | 83180060  | 14 83180060 A C   | A  | C  | 0.120  | 0.059    | 0.020  | 3.43E-03 | -0.099   | 0.020  | 7.11E-07 | 0.156     | 0.028   | 3.58E-08 | -0.021   | 0.014  | 1.40E-01 | 30500   | Microalbumin in urine |

**Supplementary Table 6 | Parent-of-origin effect genome-wide.**

CHR: chromosome; POS: genetic position (hg19); SNP ID: variant rs id; A0: reference allele; A1: assessed allele; A1FREQ: A1 allele frequency. BETA, SE and P denote effect sizes, standard errors and P-values; PAT, MAT, DIFF and ADD denote paternal, maternal, differential and additive tests. TRAIT: phenotype name. **a)** POEs robust when correcting for the number of traits tested ( $P_D < 1 \times 10^{-9}$ ). **b)** POEs genome-wide significant at the single trait level ( $1 \times 10^{-9} < P_D < 5 \times 10^{-8}$ ).

| CHR       | POS            | SNP ID             | A0       | A1       | BETA_PAT      | SE_PAT       | P_PAT           | BETA_MAT      | SE_MAT       | P_MAT           | P_DIFF          | TRAIT         | INITIAL TRAITS WITH POE AT THIS LOCUS                                                  |
|-----------|----------------|--------------------|----------|----------|---------------|--------------|-----------------|---------------|--------------|-----------------|-----------------|---------------|----------------------------------------------------------------------------------------|
| <b>11</b> | <b>1914139</b> | <b>rs576603</b>    | <b>C</b> | <b>T</b> | <b>-0.048</b> | <b>0.015</b> | <b>1.70E-03</b> | <b>0.041</b>  | <b>0.015</b> | <b>7.26E-03</b> | <b>3.29E-05</b> | <b>CBHA10</b> | <b>Standing height</b>                                                                 |
| <b>11</b> | <b>2040272</b> | <b>rs77708343</b>  | <b>A</b> | <b>G</b> | <b>-0.118</b> | <b>0.039</b> | <b>2.29E-03</b> | <b>0.071</b>  | <b>0.038</b> | <b>6.32E-02</b> | <b>4.40E-04</b> | <b>CBHA10</b> | <b>Standing height, Basal metabolic rate, Leg fat-free mass, Whole body water mass</b> |
| <b>11</b> | <b>2813322</b> | <b>rs143840904</b> | <b>C</b> | <b>T</b> | <b>-0.070</b> | <b>0.056</b> | <b>2.10E-01</b> | <b>-0.321</b> | <b>0.057</b> | <b>2.07E-08</b> | <b>2.70E-03</b> | <b>CBHA10</b> | <b>Standing height</b>                                                                 |
| 7         | 130017940      | rs4731690          | A        | G        | -0.014        | 0.009        | 1.23E-01        | -0.010        | 0.009        | 2.57E-01        | 8.13E-01        | birth weight  | HDL cholesterol                                                                        |
| 7         | 130400698      | rs3847104          | G        | A        | 0.005         | 0.014        | 7.47E-01        | 0.017         | 0.014        | 2.15E-01        | 5.24E-01        | birth weight  | Hip circumference                                                                      |
| 7         | 130463192      | rs6467315          | C        | G        | 0.002         | 0.009        | 8.61E-01        | 0.004         | 0.009        | 6.25E-01        | 8.24E-01        | birth weight  | Hip circumference                                                                      |
| 11        | 1702929        | rs10838787         | G        | A        | -0.029        | 0.009        | 2.31E-03        | 0.007         | 0.009        | 4.72E-01        | 8.04E-03        | birth weight  | Type 2 diabetes, Glycated haemoglobin                                                  |
| 11        | 2040272        | rs77708343         | A        | G        | -0.057        | 0.024        | 1.88E-02        | 0.030         | 0.024        | 1.98E-01        | 9.35E-03        | birth weight  | Standing height, Basal metabolic rate, Leg fat-free mass, Whole body water mass        |
| 11        | 2858295        | rs2299620          | C        | T        | 0.040         | 0.026        | 1.19E-01        | 0.036         | 0.025        | 1.47E-01        | 9.03E-01        | birth weight  | Glycated haemoglobin                                                                   |
| 20        | 57226079       | rs6026426          | C        | G        | -0.020        | 0.019        | 3.02E-01        | 0.030         | 0.019        | 1.16E-01        | 6.16E-02        | birth weight  | Trunk fat percentage                                                                   |
| 7         | 130017940      | rs4731690          | A        | G        | 0.032         | 0.013        | 1.34E-02        | 0.001         | 0.013        | 9.16E-01        | 1.01E-01        | CBSA10        | HDL cholesterol                                                                        |
| 7         | 130400698      | rs3847104          | G        | A        | -0.021        | 0.020        | 2.91E-01        | 0.033         | 0.019        | 9.26E-02        | 5.07E-02        | CBSA10        | Hip circumference                                                                      |
| 7         | 130463192      | rs6467315          | C        | G        | 0.013         | 0.013        | 3.16E-01        | 0.008         | 0.013        | 5.41E-01        | 7.73E-01        | CBSA10        | Hip circumference                                                                      |
| 11        | 1702929        | rs10838787         | G        | A        | -0.002        | 0.013        | 8.82E-01        | -0.013        | 0.013        | 3.40E-01        | 6.03E-01        | CBSA10        | Type 2 diabetes, Glycated haemoglobin                                                  |
| 11        | 2040272        | rs77708343         | A        | G        | -0.026        | 0.034        | 4.42E-01        | 0.026         | 0.033        | 4.42E-01        | 2.90E-01        | CBSA10        | Standing height, Basal metabolic rate, Leg fat-free mass, Whole body water mass        |
| 11        | 2858295        | rs2299620          | C        | T        | 0.049         | 0.035        | 1.62E-01        | 0.071         | 0.035        | 4.32E-02        | 7.05E-01        | CBSA10        | Glycated haemoglobin                                                                   |
| 20        | 57226079       | rs6026426          | C        | G        | 0.032         | 0.027        | 2.36E-01        | -0.043        | 0.027        | 1.10E-01        | 5.15E-02        | CBSA10        | Trunk fat percentage                                                                   |

**Supplementary Table 7 | Replication of associations with early childhood traits in the UK Biobank cohort.**

CHR: chromosome; POS: genetic position (hg19); SNP ID: variant rs id; A0: reference allele; A1: assessed allele; A1FREQ: A1 allele frequency. BETA, SE and P denote effect sizes, standard errors and P-values; PAT, MAT, DIFF and ADD denote paternal, maternal, differential and additive tests. TRAIT: phenotype name. Bold indicate significant POEs; CBHA10: comparative body height at age 10; CBSA10: comparative body size at age 10.



| BMI time point   | N     |
|------------------|-------|
| BMI at 6 Weeks   | 29791 |
| BMI at 3 Months  | 41865 |
| BMI at 6 Months  | 42346 |
| BMI at 8 Months  | 36790 |
| BMI at 1 Year    | 36721 |
| BMI at 16 Months | 27595 |
| BMI at 2 Years   | 27435 |
| BMI at 3 Years   | 27985 |
| BMI at 5 Years   | 22667 |
| BMI at 7 Years   | 23280 |
| BMI at 8 Years   | 17888 |

Supplementary Table 8 | Number of individuals per BMI time points in the MoBa cohort.

| ID         | BMI timepoints | BETA PAT | SE PAT | P PAT    | BETA MAT | SE MAT | P MAT    | BETA MAT NT | SE MAT NT | P MAT NT | P DIFF          | P DIFF MAT | INITIAL TRAITS WITH POE AT THIS LOCUS                    |
|------------|----------------|----------|--------|----------|----------|--------|----------|-------------|-----------|----------|-----------------|------------|----------------------------------------------------------|
| rs6467315  | 6 weeks        | -0.019   | 0.015  | 2.04E-01 | 0.071    | 0.015  | 1.26E-06 | 0.028       | 0.014     | 4.74E-02 | <b>1.51E-05</b> | 3.47E-02   | Hip circumference                                        |
|            | 3 months       | 0.001    | 0.012  | 9.62E-01 | 0.085    | 0.012  | 9.46E-12 | 0.003       | 0.012     | 7.74E-01 | <b>1.68E-06</b> | 2.50E-06   |                                                          |
|            | 6 months       | 0.003    | 0.012  | 8.12E-01 | 0.089    | 0.012  | 7.72E-13 | 0.016       | 0.012     | 1.96E-01 | <b>9.43E-07</b> | 2.02E-05   |                                                          |
|            | 8 months       | 0.012    | 0.013  | 3.75E-01 | 0.087    | 0.013  | 6.15E-11 | 0.009       | 0.013     | 4.97E-01 | <b>6.30E-05</b> | 2.23E-05   |                                                          |
|            | 12 months      | -0.007   | 0.013  | 5.75E-01 | 0.069    | 0.013  | 2.20E-07 | 0.000       | 0.013     | 9.88E-01 | <b>4.85E-05</b> | 1.82E-04   |                                                          |
|            | 16 months      | -0.011   | 0.015  | 4.51E-01 | 0.066    | 0.015  | 1.24E-05 | 0.011       | 0.015     | 4.39E-01 | <b>2.90E-04</b> | 9.05E-03   |                                                          |
|            | 2 years        | -0.017   | 0.015  | 2.67E-01 | 0.057    | 0.015  | 1.81E-04 | 0.017       | 0.015     | 2.47E-01 | <b>5.95E-04</b> | 5.81E-02   |                                                          |
|            | 3 years        | 0.012    | 0.015  | 4.17E-01 | 0.058    | 0.015  | 9.60E-05 | 0.003       | 0.014     | 8.61E-01 | 2.89E-02        | 7.20E-03   |                                                          |
|            | 5 years        | -0.013   | 0.016  | 4.38E-01 | 0.031    | 0.016  | 5.77E-02 | -0.013      | 0.016     | 4.09E-01 | 5.86E-02        | 5.24E-02   |                                                          |
|            | 7 years        | -0.023   | 0.016  | 1.54E-01 | 0.030    | 0.016  | 6.63E-02 | -0.008      | 0.016     | 6.24E-01 | 2.10E-02        | 9.68E-02   |                                                          |
|            | 8 years        | -0.004   | 0.019  | 8.43E-01 | 0.026    | 0.019  | 1.69E-01 | 0.024       | 0.018     | 1.81E-01 | 2.66E-01        | 9.48E-01   |                                                          |
| rs10838787 | 6 weeks        | -0.006   | 0.015  | 6.76E-01 | 0.028    | 0.015  | 5.61E-02 | 0.016       | 0.014     | 2.57E-01 | 9.96E-02        | 5.51E-01   | Type 2 diabetes, Glycated haemoglobin, Glucose           |
|            | 3 months       | -0.020   | 0.013  | 1.16E-01 | 0.019    | 0.013  | 1.28E-01 | 0.025       | 0.012     | 3.68E-02 | 2.88E-02        | 7.28E-01   |                                                          |
|            | 6 months       | -0.028   | 0.013  | 2.75E-02 | 0.017    | 0.013  | 1.82E-01 | 0.024       | 0.012     | 4.81E-02 | 1.23E-02        | 6.86E-01   |                                                          |
|            | 8 months       | -0.046   | 0.013  | 6.09E-04 | 0.011    | 0.013  | 4.20E-01 | 0.030       | 0.013     | 2.12E-02 | 2.74E-03        | 3.12E-01   |                                                          |
|            | 12 months      | -0.042   | 0.013  | 1.96E-03 | 0.009    | 0.013  | 5.22E-01 | 0.030       | 0.013     | 1.83E-02 | 8.24E-03        | 2.42E-01   |                                                          |
|            | 16 months      | -0.044   | 0.015  | 3.58E-03 | 0.008    | 0.015  | 5.91E-01 | 0.007       | 0.015     | 6.52E-01 | 1.47E-02        | 9.40E-01   |                                                          |
|            | 2 years        | -0.029   | 0.015  | 5.51E-02 | 0.003    | 0.015  | 8.63E-01 | -0.001      | 0.015     | 9.56E-01 | 1.39E-01        | 8.70E-01   |                                                          |
|            | 3 years        | -0.038   | 0.015  | 1.15E-02 | -0.002   | 0.015  | 8.84E-01 | 0.015       | 0.014     | 2.92E-01 | 9.21E-02        | 4.04E-01   |                                                          |
|            | 5 years        | -0.021   | 0.016  | 2.11E-01 | -0.010   | 0.016  | 5.37E-01 | 0.013       | 0.016     | 4.12E-01 | 6.54E-01        | 3.11E-01   |                                                          |
|            | 7 years        | -0.018   | 0.017  | 2.71E-01 | -0.004   | 0.017  | 8.24E-01 | 0.024       | 0.016     | 1.32E-01 | 5.35E-01        | 2.29E-01   |                                                          |
|            | 8 years        | -0.001   | 0.019  | 9.76E-01 | -0.007   | 0.019  | 6.91E-01 | 0.036       | 0.018     | 4.67E-02 | 7.95E-01        | 9.61E-02   |                                                          |
| rs2299620  | 6 weeks        | -0.040   | 0.040  | 3.17E-01 | -0.025   | -0.040 | 5.36E-01 | 0.013       | 0.037     | 7.30E-01 | 2.53E-01        | 4.91E-01   | Glycated haemoglobin                                     |
|            | 3 months       | 0.017    | 0.034  | 6.17E-01 | -0.045   | -0.034 | 1.79E-01 | 0.034       | 0.032     | 2.92E-01 | 5.60E-01        | 8.92E-02   |                                                          |
|            | 6 months       | 0.043    | 0.034  | 2.13E-01 | -0.015   | -0.034 | 6.67E-01 | -0.013      | 0.032     | 6.96E-01 | 5.59E-01        | 6.86E-01   |                                                          |
|            | 8 months       | 0.044    | 0.037  | 2.35E-01 | 0.016    | -0.036 | 6.62E-01 | 0.007       | 0.034     | 8.36E-01 | 2.47E-01        | 8.62E-01   |                                                          |
|            | 12 months      | 0.021    | 0.037  | 5.71E-01 | 0.034    | -0.036 | 3.41E-01 | 0.010       | 0.034     | 7.81E-01 | 2.85E-01        | 6.20E-01   |                                                          |
|            | 16 months      | 0.030    | 0.042  | 4.71E-01 | 0.050    | -0.041 | 2.22E-01 | -0.015      | 0.039     | 7.05E-01 | 1.71E-01        | 2.51E-01   |                                                          |
|            | 2 years        | 0.036    | 0.042  | 3.83E-01 | 0.035    | -0.041 | 3.92E-01 | 0.046       | 0.039     | 2.35E-01 | 2.21E-01        | 8.55E-01   |                                                          |
|            | 3 years        | 0.008    | 0.041  | 8.49E-01 | 0.055    | -0.041 | 1.78E-01 | 0.019       | 0.038     | 6.22E-01 | 2.80E-01        | 5.18E-01   |                                                          |
|            | 5 years        | -0.004   | 0.045  | 9.32E-01 | 0.020    | -0.044 | 6.47E-01 | 0.012       | 0.041     | 7.79E-01 | 7.94E-01        | 8.87E-01   |                                                          |
|            | 7 years        | 0.066    | 0.045  | 1.45E-01 | 0.082    | -0.045 | 6.65E-02 | 0.005       | 0.042     | 8.96E-01 | 1.99E-02        | 2.10E-01   |                                                          |
|            | 8 years        | -0.007   | 0.051  | 8.88E-01 | 0.074    | -0.050 | 1.40E-01 | 0.011       | 0.047     | 8.13E-01 | 3.53E-01        | 3.61E-01   |                                                          |
| rs4731690  | 6 weeks        | 0.008    | 0.015  | 5.82E-01 | 0.025    | 0.015  | 8.35E-02 | 0.016       | 0.014     | 2.52E-01 | 4.04E-01        | 6.49E-01   | HDL cholesterol, Triglycerides, SHBG                     |
|            | 3 months       | -0.001   | 0.012  | 9.14E-01 | 0.034    | 0.012  | 6.90E-03 | 0.019       | 0.012     | 1.19E-01 | 4.70E-02        | 3.88E-01   |                                                          |
|            | 6 months       | 0.006    | 0.012  | 6.12E-01 | 0.039    | 0.012  | 1.72E-03 | 0.007       | 0.012     | 5.86E-01 | 6.33E-02        | 6.04E-02   |                                                          |
|            | 8 months       | 0.008    | 0.013  | 5.41E-01 | 0.031    | 0.013  | 2.10E-02 | 0.004       | 0.013     | 7.39E-01 | 2.30E-01        | 1.53E-01   |                                                          |
|            | 12 months      | 0.004    | 0.013  | 7.40E-01 | 0.037    | 0.013  | 6.00E-03 | -0.002      | 0.013     | 8.59E-01 | 8.76E-02        | 3.56E-02   |                                                          |
|            | 16 months      | 0.017    | 0.015  | 2.58E-01 | 0.010    | 0.015  | 4.99E-01 | -0.002      | 0.015     | 9.18E-01 | 7.48E-01        | 5.76E-01   |                                                          |
|            | 2 years        | 0.036    | 0.015  | 1.87E-02 | 0.005    | 0.015  | 7.39E-01 | -0.007      | 0.015     | 6.41E-01 | 1.53E-01        | 5.73E-01   |                                                          |
|            | 3 years        | 0.021    | 0.015  | 1.57E-01 | -0.007   | 0.015  | 6.18E-01 | -0.019      | 0.014     | 1.85E-01 | 1.76E-01        | 5.75E-01   |                                                          |
|            | 5 years        | 0.041    | 0.016  | 1.23E-02 | -0.012   | 0.016  | 4.69E-01 | -0.002      | 0.016     | 8.89E-01 | 2.25E-02        | 6.71E-01   |                                                          |
|            | 7 years        | -0.003   | 0.016  | 8.60E-01 | 0.015    | 0.016  | 3.54E-01 | -0.020      | 0.016     | 2.07E-01 | 4.35E-01        | 1.23E-01   |                                                          |
|            | 8 years        | 0.019    | 0.019  | 3.17E-01 | 0.007    | 0.019  | 7.13E-01 | -0.042      | 0.018     | 1.86E-02 | 6.55E-01        | 5.77E-02   |                                                          |
| rs6026426  | 6 weeks        | -0.069   | -0.028 | 1.20E-02 | 0.021    | 0.027  | 4.39E-01 | 0.006       | 0.026     | 8.33E-01 | 2.06E-01        | 4.84E-01   | Trunk fat percentage, Arm, Leg and Body fat percentages  |
|            | 3 months       | -0.059   | -0.023 | 1.06E-02 | -0.006   | 0.023  | 7.95E-01 | -0.012      | 0.022     | 5.90E-01 | 4.49E-02        | 5.74E-01   |                                                          |
|            | 6 months       | -0.063   | -0.023 | 6.68E-03 | -0.005   | 0.023  | 8.37E-01 | -0.026      | 0.022     | 2.40E-01 | 3.76E-02        | 3.33E-01   |                                                          |
|            | 8 months       | -0.055   | -0.025 | 2.57E-02 | -0.008   | 0.024  | 7.39E-01 | -0.034      | 0.024     | 1.54E-01 | 6.79E-02        | 2.18E-01   |                                                          |
|            | 12 months      | -0.058   | -0.025 | 1.90E-02 | -0.024   | 0.024  | 3.32E-01 | -0.026      | 0.023     | 2.76E-01 | 1.85E-02        | 1.46E-01   |                                                          |
|            | 16 months      | -0.035   | -0.028 | 2.21E-01 | -0.034   | 0.027  | 2.08E-01 | -0.028      | 0.027     | 3.03E-01 | 7.92E-02        | 1.05E-01   |                                                          |
|            | 2 years        | -0.043   | -0.028 | 1.29E-01 | -0.020   | 0.027  | 4.73E-01 | -0.002      | 0.027     | 9.50E-01 | 1.12E-01        | 5.77E-01   |                                                          |
|            | 3 years        | -0.005   | -0.028 | 8.60E-01 | -0.036   | 0.027  | 1.76E-01 | -0.002      | 0.026     | 9.37E-01 | 2.86E-01        | 3.05E-01   |                                                          |
|            | 5 years        | -0.065   | -0.031 | 3.29E-02 | -0.030   | 0.029  | 3.05E-01 | -0.041      | 0.029     | 1.57E-01 | 2.44E-02        | 8.46E-02   |                                                          |
|            | 7 years        | -0.063   | -0.031 | 3.87E-02 | -0.013   | 0.030  | 6.61E-01 | -0.013      | 0.029     | 6.47E-01 | 7.40E-02        | 5.26E-01   |                                                          |
|            | 8 years        | -0.033   | -0.035 | 3.39E-01 | -0.006   | 0.033  | 8.50E-01 | -0.038      | 0.033     | 2.43E-01 | 4.11E-01        | 3.42E-01   |                                                          |
| rs77708343 | 6 weeks        | -0.004   | 0.031  | 8.97E-01 | 0.057    | 0.031  | 6.87E-02 | 0.017       | 0.030     | 5.61E-01 | 1.68E-01        | 3.62E-01   | Standing height, Basal metabolic rate, Leg fat-free mass |
|            | 3 months       | -0.055   | 0.027  | 3.88E-02 | 0.021    | 0.027  | 4.24E-01 | 0.023       | 0.026     | 3.58E-01 | 4.29E-02        | 9.54E-01   |                                                          |
|            | 6 months       | -0.057   | 0.027  | 3.18E-02 | 0.033    | 0.027  | 2.13E-01 | 0.025       | 0.026     | 3.21E-01 | 1.66E-02        | 8.29E-01   |                                                          |
|            | 8 months       | -0.077   | 0.029  | 7.56E-03 | 0.040    | 0.029  | 1.62E-01 | 0.043       | 0.027     | 1.11E-01 | 4.03E-03        | 9.40E-01   |                                                          |
|            | 12 months      | -0.039   | 0.029  | 1.70E-01 | 0.050    | 0.029  | 8.59E-02 | 0.043       | 0.027     | 1.13E-01 | 2.88E-02        | 8.71E-01   |                                                          |
|            | 16 months      | -0.043   | 0.032  | 1.88E-01 | 0.015    | 0.033  | 6.52E-01 | 0.037       | 0.031     | 2.24E-01 | 2.14E-01        | 6.23E-01   |                                                          |
|            | 2 years        | -0.028   | 0.033  | 3.88E-01 | 0.044    | 0.033  | 1.82E-01 | 0.003       | 0.030     | 9.18E-01 | 1.20E-01        | 3.62E-01   |                                                          |
|            | 3 years        | -0.014   | 0.032  | 6.67E-01 | 0.044    | 0.033  | 1.82E-01 | 0.011       | 0.030     | 7.04E-01 | 2.09E-01        | 4.65E-01   |                                                          |
|            | 5 years        | -0.049   | 0.035  | 1.57E-01 | 0.061    | 0.036  | 8.70E-02 | 0.038       | 0.033     | 2.48E-01 | 2.69E-02        | 6.41E-01   |                                                          |
|            | 7 years        | -0.038   | 0.035  | 2.82E-01 | 0.080    | 0.036  | 2.50E-02 | 0.089       | 0.034     | 8.60E-03 | 1.87E-02        | 8.63E-01   |                                                          |
|            | 8 years        | -0.023   | 0.041  | 5.68E-01 | 0.047    | 0.040  | 2.45E-01 | 0.060       | 0.038     | 1.11E-01 | 2.22E-01        | 8.06E-01   |                                                          |
| rs3847104  | 6 weeks        | 0.012    | 0.023  | 5.94E-01 | -0.031   | 0.023  | 1.78E-01 | 0.009       | 0.022     | 6.97E-01 | 1.85E-01        | 2.16E-01   | Hip circumference                                        |
|            | 3 months       | -0.013   | 0.019  | 4.88E-01 | -0.036   | 0.019  | 6.25E-02 | -0.017      | 0.019     | 3.70E-01 | 4.06E-01        | 4.74E-01   |                                                          |
|            | 6 months       | 0.003    | 0.019  | 8.71E-01 | -0.031   | 0.019  | 1.09E-01 | -0.005      | 0.019     | 7.74E-01 | 2.10E-01        | 3.40E-01   |                                                          |
|            | 8 months       | -0.018   | 0.021  | 3.75E-01 | -0.020   | 0.020  | 3.34E-01 | 0.015       | 0.020     | 4.43E-01 | 9.57E-01        | 2.20E-01   |                                                          |
|            | 12 months      | 0.004    | 0.021  | 8.42E-01 | -0.010   | 0.021  | 6.33E-01 | 0.004       | 0.020     | 8.34E-01 | 6.32E-01        | 6.25E-01   |                                                          |
|            | 16 months      | 0.004    | 0.023  | 8.78E-01 | 0.006    | 0.023  | 8.09E-01 | 0.024       | 0.023     | 2.93E-01 | 9.50E-01        | 5.76E-01   |                                                          |
|            | 2 years        | -0.001   | 0.023  | 9.63E-01 | -0.037   | 0.023  | 1.16E-01 | 0.024       | 0.023     | 2.89E-01 | 2.81E-01        | 6.21E-02   |                                                          |
|            | 3 years        | 0.016    | 0.023  | 4.91E-01 | -0.016   | 0.023  | 4.92E-01 | 0.017       | 0.022     | 4.58E-01 | 3.31E-01        | 3.12E-01   |                                                          |
|            | 5 years        | 0.016    | 0.025  | 5.32E-01 | 0.005    | 0.025  | 8.49E-01 | 0.032       | 0.025     | 1.88E-01 | 7.57E-01        | 4.33E-01   |                                                          |
|            | 7 years        | -0.024   | 0.025  | 3.34E-01 | -0.018   | 0.025  | 4.70E-01 | 0.034       | 0.025     | 1.68E-01 | 8.61E-01        | 1.39E-01   |                                                          |
|            | 8 years        | 0.029    | 0.029  | 3.03E-01 | -0.025   | 0.028  | 3.89E-01 | 0.008       | 0.028     | 7.69E-01 | 1.81E-01        | 4.10E-01   |                                                          |

**Supplementary Table 9 | Replication of associations with infancy and childhood BMI in the MoBa cohort.**

SNP ID: variant rs id; BETA, SE and P denote effect sizes

| CHR       | POS            | SNP ID           | A0       | A1       | P DIFF COMB     | P DIFF MALES    | P DIFF FEMALES  | P <sub>Z</sub>  | TRAIT                 |
|-----------|----------------|------------------|----------|----------|-----------------|-----------------|-----------------|-----------------|-----------------------|
| 11        | 1914139        | rs576603         | C        | T        | 3.86E-08        | 3.53E-04        | 1.77E-04        | 7.34E-01        | Standing height       |
| 11        | 2040272        | rs77708343       | A        | G        | 2.18E-09        | 2.61E-03        | 2.88E-08        | 4.51E-02        | Standing height       |
| 11        | 2813322        | rs143840904      | C        | T        | 5.21E-13        | 4.48E-06        | 1.15E-08        | 2.53E-01        | Standing height       |
| 11        | 2040272        | rs77708343       | A        | G        | 7.53E-08        | 1.43E-05        | 1.24E-03        | 6.68E-01        | Basal metabolic rate  |
| 11        | 2040272        | rs77708343       | A        | G        | 1.80E-08        | 1.05E-05        | 4.44E-04        | 8.22E-01        | Leg fat-free mass     |
| 11        | 2040272        | rs77708343       | A        | G        | 1.63E-07        | 1.11E-05        | 2.99E-03        | 4.94E-01        | Whole body water mass |
| 11        | 2041348        | rs78507815       | G        | T        | 3.61E-07        | 4.57E-06        | 9.55E-03        | 2.71E-01        | Trunk fat-free mass   |
| <b>11</b> | <b>1703564</b> | <b>rs4417225</b> | <b>C</b> | <b>T</b> | <b>7.40E-08</b> | <b>4.79E-09</b> | <b>1.93E-01</b> | <b>1.38E-03</b> | <b>Glucose</b>        |
| 11        | 1702929        | rs10838787       | G        | A        | 1.87E-09        | 7.56E-06        | 4.47E-05        | 4.49E-01        | Type 2 diabetes       |
| 11        | 1702929        | rs10838787       | G        | A        | 2.77E-17        | 2.29E-10        | 8.53E-08        | 4.03E-01        | Glycated haemoglobin  |
| 11        | 2858295        | rs2299620        | C        | T        | 2.23E-06        | 1.52E-04        | 4.23E-03        | 4.48E-01        | Glycated haemoglobin  |
| 11        | 1920285        | rs4264135        | A        | G        | 2.22E-07        | 1.42E-04        | 1.72E-04        | 8.67E-01        | Urate                 |
| 11        | 1998031        | rs170102         | G        | A        | 5.98E-14        | 2.98E-09        | 1.69E-06        | 8.34E-01        | Cystatin C            |
| 11        | 2003944        | rs217215         | T        | G        | 4.94E-11        | 4.15E-07        | 2.00E-05        | 9.43E-01        | Creatinine            |
| 7         | 130009312      | rs10239342       | T        | G        | 1.87E-06        | 2.42E-06        | 9.73E-03        | 5.34E-01        | SHBG                  |
| 7         | 130016470      | rs62471721       | G        | A        | 6.51E-09        | 2.03E-07        | 1.52E-03        | 1.54E-01        | Triglycerides         |
| 7         | 130017940      | rs4731690        | A        | G        | 1.92E-06        | 2.62E-04        | 1.89E-03        | 8.51E-01        | HDL cholesterol       |
| 7         | 130400698      | rs3847104        | G        | A        | 3.81E-07        | 3.56E-03        | 4.89E-04        | 2.55E-01        | Hip circumference     |
| 7         | 130463192      | rs6467315        | C        | G        | 2.20E-06        | 5.05E-02        | 5.03E-06        | 9.52E-03        | Hip circumference     |
| 20        | 57216538       | rs80116540       | A        | G        | 3.39E-08        | 4.70E-03        | 1.36E-06        | 3.42E-02        | Arm fat percentage    |
| 20        | 57216538       | rs80116540       | A        | G        | 2.06E-07        | 5.35E-03        | 7.47E-06        | 9.69E-02        | Body fat percentage   |
| 20        | 57226079       | rs6026426        | C        | G        | 1.29E-06        | 5.63E-03        | 6.97E-05        | 1.51E-01        | Trunk fat percentage  |
| 20        | 57484934       | rs3730173        | C        | T        | 5.32E-07        | 9.03E-04        | 1.59E-04        | 5.21E-01        | Leg fat percentage    |
| 6         | 144274210      | rs12528876       | T        | C        | 2.96E-06        | 2.68E-04        | 2.62E-03        | 8.62E-01        | IGF-1                 |
| 16        | 3412861        | rs7188903        | A        | G        | 6.14E-07        | 6.83E-05        | 2.00E-03        | 7.25E-01        | IGF-1                 |
| 15        | 25983333       | rs146982369      | C        | G        | 2.59E-06        | 1.12E-03        | 6.15E-04        | 7.00E-01        | Total protein         |
| 14        | 101185187      | rs59228823       | G        | C        | 1.92E-14        | 5.83E-08        | 5.43E-08        | 7.05E-01        | Platelet count        |
| 3         | 169482335      | rs2293607        | T        | C        | 5.70E-07        | 3.50E-04        | 4.22E-04        | 8.44E-01        | TS ratio              |
| 4         | 164012901      | rs11100479       | C        | T        | 6.25E-07        | 3.00E-04        | 5.41E-04        | 9.20E-01        | TS ratio              |
| 5         | 1285974        | rs7705526        | C        | A        | 5.82E-11        | 5.87E-05        | 1.33E-07        | 2.48E-01        | TS ratio              |

Supplementary Table 10 | Sex-specificity of Parent-of-Origin effects.

CHR: chromosome; POS: genetic position (hg19); SNP ID: variant rs id; A0: reference allele; A1: assessed allele; P DIFF denote P-values for the differential test; COMB, MALES, and FEMALES denote combined sex, males only and females only.  $P_Z$ : denotes the P-values for the comparison tests between males-specific and females-specific coefficients using a Z-score approach; TRAIT: phenotype name. Bold indicates the significant sex-specific POE.

| CHR | POS (hg38) | UKB SNP     | ASSESSED SNP | LD    | A0 | A1 | N     | BETA PAT | SE PAT | P PAT    | BETA MAT | SE MAT | P MAT    | BETA DIFF | SE DIFF | P DIFF   | TRAIT                |
|-----|------------|-------------|--------------|-------|----|----|-------|----------|--------|----------|----------|--------|----------|-----------|---------|----------|----------------------|
| 14  | 100718850  | rs59228823  | rs59228823   |       | G  | C  | 67266 | -0.007   | 0.008  | 3.55E-01 | -0.087   | 0.008  | 4.49E-30 | 0.078     | 0.011   | 2.97E-13 | Platelet count       |
| 11  | 1899055    | rs217215    | rs4264135    | 0.613 | A  | G  | 77270 | -0.028   | 0.006  | 2.21E-06 | 0.030    | 0.006  | 4.27E-07 | -0.058    | 0.008   | 4.40E-12 | Creatinine           |
| 11  | 2792092    | rs143840904 | rs143840904  |       | C  | T  | 61630 | -0.005   | 0.020  | 7.98E-01 | -0.175   | 0.021  | 1.70E-17 | 0.162     | 0.028   | 7.94E-09 | Standing height      |
| 7   | 130378099  | rs4731690   | rs4731690    |       | A  | G  | 81884 | 0.009    | 0.002  | 1.18E-05 | -0.007   | 0.002  | 1.01E-03 | 0.016     | 0.003   | 6.86E-08 | HDL cholesterol      |
| 11  | 1921890    | rs576603    | rs735955     | 0.881 | G  | A  | 61630 | -0.027   | 0.005  | 1.39E-07 | 0.005    | 0.005  | 3.11E-01 | -0.033    | 0.007   | 6.40E-06 | Standing height      |
| 11  | 1694102    | rs10838787  | rs7130416    | 0.921 | T  | C  | 20203 | 0.054    | 0.013  | 2.17E-05 | -0.027   | 0.013  | 3.46E-02 | 0.079     | 0.018   | 9.51E-06 | Glycated haemoglobin |
| 7   | 130376629  | rs62471721  | rs62471721   |       | G  | A  | 81884 | -0.012   | 0.006  | 5.21E-02 | 0.024    | 0.006  | 4.74E-05 | -0.036    | 0.008   | 1.91E-05 | Triglycerides        |
| 11  | 1682334    | rs10838787  | rs4417225    | 0.998 | C  | T  | 85050 | 0.092    | 0.035  | 9.60E-03 | -0.101   | 0.035  | 4.17E-03 | 0.189     | 0.050   | 1.47E-04 | Type 2 diabetes      |
| 11  | 1682334    | rs4417225   | rs4417225    |       | C  | T  | 80403 | 0.030    | 0.009  | 5.87E-04 | -0.017   | 0.009  | 5.81E-02 | 0.046     | 0.012   | 1.92E-04 | Glucose              |
| 11  | 1904723    | rs170102    | rs61868802   | 0.608 | A  | G  | 21851 | 0.029    | 0.011  | 6.33E-03 | -0.015   | 0.011  | 1.66E-01 | 0.045     | 0.015   | 3.15E-03 | Cystatin C           |
| 11  | 2837065    | rs2299620   | rs2299620    |       | C  | T  | 20203 | 0.060    | 0.034  | 8.07E-02 | -0.070   | 0.034  | 3.83E-02 | 0.130     | 0.048   | 6.79E-03 | Glycated haemoglobin |
| 11  | 1902116    | rs77708343  | rs145861779  | 0.479 | C  | T  | 61630 | -0.044   | 0.012  | 2.12E-04 | -0.006   | 0.012  | 6.36E-01 | -0.040    | 0.016   | 1.56E-02 | Standing height      |
| 7   | 130715870  | rs3847104   | rs3847104    |       | G  | A  | 55874 | -0.010   | 0.010  | 3.29E-01 | 0.010    | 0.010  | 3.55E-01 | -0.020    | 0.015   | 1.70E-01 | Hip circumference    |
| 7   | 130778999  | rs6467315   | rs10954284   | 0.999 | T  | A  | 55874 | 0.001    | 0.007  | 8.78E-01 | 0.009    | 0.007  | 1.81E-01 | -0.008    | 0.010   | 4.07E-01 | Hip circumference    |

**Supplementary Table 11 | Replication of parent-of-origin effects in the Estonian Biobank cohort.**

CHR: chromosome; POS: genetic position (hg38); UKBB SNP: variant exhibiting POE on the trait in the UK Biobank (UKBB); ASSESSED SNP: variant tested for POE in the Estonian Biobank (EstBB); LD: Linkage Disequilibrium (LD) between the UKBB variant and the assessed variant, if not the same variant. LD was computed in the UK Biobank cohort; A0: reference allele of the assessed variant in the EstBB; A1: assessed allele of the assessed variant in the EstBB; N: number of individuals with available trait levels (includes individuals both homozygous and heterozygous for the assessed variant); BETA, SE and P denote effect sizes, standard errors and P-values; PAT, MAT and DIFF denote paternal, maternal and differential tests. TRAIT: phenotype name. Bold indicate replicated associations.
